# Supplementary material for: New Casbane Diterpenoids from a South China Sea Soft Coral, Sinularia sp
Source: PubMed Central journal article supplement (PMC3640392; doi:10.3390/md11020455), 2013-02-06

## Supplementary Information

|                                                                                                     |    |
|-----------------------------------------------------------------------------------------------------|----|
| <b>Figure S1.</b> $^1\text{H}$ NMR spectrum (500 MHz) of compound <b>1</b> in $\text{CDCl}_3$ .     | 3  |
| <b>Figure S2.</b> $^{13}\text{C}$ NMR spectrum (125 MHz) of compound <b>1</b> in $\text{CDCl}_3$ .  | 3  |
| <b>Figure S3.</b> HSQC spectrum (500 MHz) of compound <b>1</b> in $\text{CDCl}_3$ .                 | 4  |
| <b>Figure S4.</b> HMBC spectrum (500 MHz) of compound <b>1</b> in $\text{CDCl}_3$ .                 | 4  |
| <b>Figure S5.</b> COSY spectrum (500 MHz) of compound <b>1</b> in $\text{CDCl}_3$ .                 | 5  |
| <b>Figure S6.</b> NOESY spectrum (500 MHz) of compound <b>1</b> in $\text{CDCl}_3$ .                | 5  |
| <b>Figure S7.</b> IR spectrum of compound <b>1</b> .                                                | 6  |
| <b>Figure S8.</b> HR-ESIMS spectrum of compound <b>1</b> .                                          | 6  |
| <b>Figure S9.</b> $^1\text{H}$ NMR spectrum (500 MHz) of compound <b>2</b> in $\text{CDCl}_3$ .     | 7  |
| <b>Figure S10.</b> $^{13}\text{C}$ NMR spectrum (125 MHz) of compound <b>2</b> in $\text{CDCl}_3$ . | 7  |
| <b>Figure S11.</b> HSQC spectrum (500 MHz) of compound <b>2</b> in $\text{CDCl}_3$ .                | 8  |
| <b>Figure S12.</b> HMBC spectrum (500 MHz) of compound <b>2</b> in $\text{CDCl}_3$ .                | 8  |
| <b>Figure S13.</b> COSY spectrum (500 MHz) of compound <b>2</b> in $\text{CDCl}_3$ .                | 9  |
| <b>Figure S14.</b> NOESY spectrum (500 MHz) of compound <b>2</b> in $\text{CDCl}_3$ .               | 9  |
| <b>Figure S15.</b> IR spectrum of compound <b>2</b> .                                               | 10 |
| <b>Figure S16.</b> HR-ESIMS spectrum of compound <b>2</b> .                                         | 10 |
| <b>Figure S17.</b> $^1\text{H}$ NMR spectrum (500 MHz) of compound <b>3</b> in $\text{CDCl}_3$ .    | 11 |
| <b>Figure S18.</b> $^{13}\text{C}$ NMR spectrum (125 MHz) of compound <b>3</b> in $\text{CDCl}_3$ . | 11 |
| <b>Figure S19.</b> HSQC spectrum (500 MHz) of compound <b>3</b> in $\text{CDCl}_3$ .                | 12 |
| <b>Figure S20.</b> HMBC spectrum (500 MHz) of compound <b>3</b> in $\text{CDCl}_3$ .                | 12 |
| <b>Figure S21.</b> COSY spectrum (500 MHz) of compound <b>3</b> in $\text{CDCl}_3$ .                | 13 |
| <b>Figure S22.</b> NOESY spectrum (500 MHz) of compound <b>3</b> in $\text{CDCl}_3$ .               | 13 |
| <b>Figure S23.</b> IR spectrum of compound <b>3</b> .                                               | 14 |
| <b>Figure S24.</b> HR-ESIMS spectrum of compound <b>3</b> .                                         | 14 |
| <b>Figure S25.</b> $^1\text{H}$ NMR spectrum (500 MHz) of compound <b>4</b> in $\text{CDCl}_3$ .    | 15 |
| <b>Figure S26.</b> $^{13}\text{C}$ NMR spectrum (125 MHz) of compound <b>4</b> in $\text{CDCl}_3$ . | 15 |
| <b>Figure S27.</b> HSQC spectrum (500 MHz) of compound <b>4</b> in $\text{CDCl}_3$ .                | 16 |
| <b>Figure S28.</b> HMBC spectrum (500 MHz) of compound <b>4</b> in $\text{CDCl}_3$ .                | 16 |
| <b>Figure S29.</b> COSY spectrum (500 MHz) of compound <b>4</b> in $\text{CDCl}_3$ .                | 17 |
| <b>Figure S30.</b> NOESY spectrum (500 MHz) of compound <b>4</b> in $\text{CDCl}_3$ .               | 17 |
| <b>Figure S31.</b> IR spectrum of compound <b>4</b> .                                               | 18 |
| <b>Figure S32.</b> HR-ESIMS spectrum of compound <b>4</b> .                                         | 18 |
| <b>Figure S33.</b> $^1\text{H}$ NMR spectrum (500 MHz) of compound <b>5</b> in $\text{CDCl}_3$ .    | 19 |
| <b>Figure S34.</b> $^{13}\text{C}$ NMR spectrum (125 MHz) of compound <b>5</b> in $\text{CDCl}_3$ . | 19 |
| <b>Figure S35.</b> HSQC spectrum (500 MHz) of compound <b>5</b> in $\text{CDCl}_3$ .                | 20 |
| <b>Figure S36.</b> HMBC spectrum (500 MHz) of compound <b>5</b> in $\text{CDCl}_3$ .                | 20 |
| <b>Figure S37.</b> COSY spectrum (500 MHz) of compound <b>5</b> in $\text{CDCl}_3$ .                | 21 |
| <b>Figure S38.</b> NOESY spectrum (500 MHz) of compound <b>5</b> in $\text{CDCl}_3$ .               | 21 |
| <b>Figure S39.</b> IR spectrum of compound <b>5</b> .                                               | 22 |
| <b>Figure S40.</b> HR-ESIMS spectrum of compound <b>5</b> .                                         | 22 |
| <b>Figure S41.</b> $^1\text{H}$ NMR spectrum (500 MHz) of compound <b>6</b> in $\text{CDCl}_3$ .    | 23 |

|                                                                                                     |    |
|-----------------------------------------------------------------------------------------------------|----|
| <b>Figure S42.</b> $^{13}\text{C}$ NMR spectrum (125 MHz) of compound <b>6</b> in $\text{CDCl}_3$ . | 23 |
| <b>Figure S43.</b> HSQC spectrum (500 MHz) of compound <b>6</b> in $\text{CDCl}_3$ .                | 24 |
| <b>Figure S44.</b> HMBC spectrum (500 MHz) of compound <b>6</b> in $\text{CDCl}_3$ .                | 24 |
| <b>Figure S45.</b> COSY spectrum (500 MHz) of compound <b>6</b> in $\text{CDCl}_3$ .                | 25 |
| <b>Figure S46.</b> NOESY spectrum (500 MHz) of compound <b>6</b> in $\text{CDCl}_3$ .               | 25 |
| <b>Figure S47.</b> IR spectrum of compound <b>6</b> .                                               | 26 |
| <b>Figure S48.</b> HR-ESIMS spectrum of compound <b>6</b> .                                         | 26 |

**Figure S1.**  $^1\text{H}$  NMR spectrum (500 MHz) of compound **1** in  $\text{CDCl}_3$ .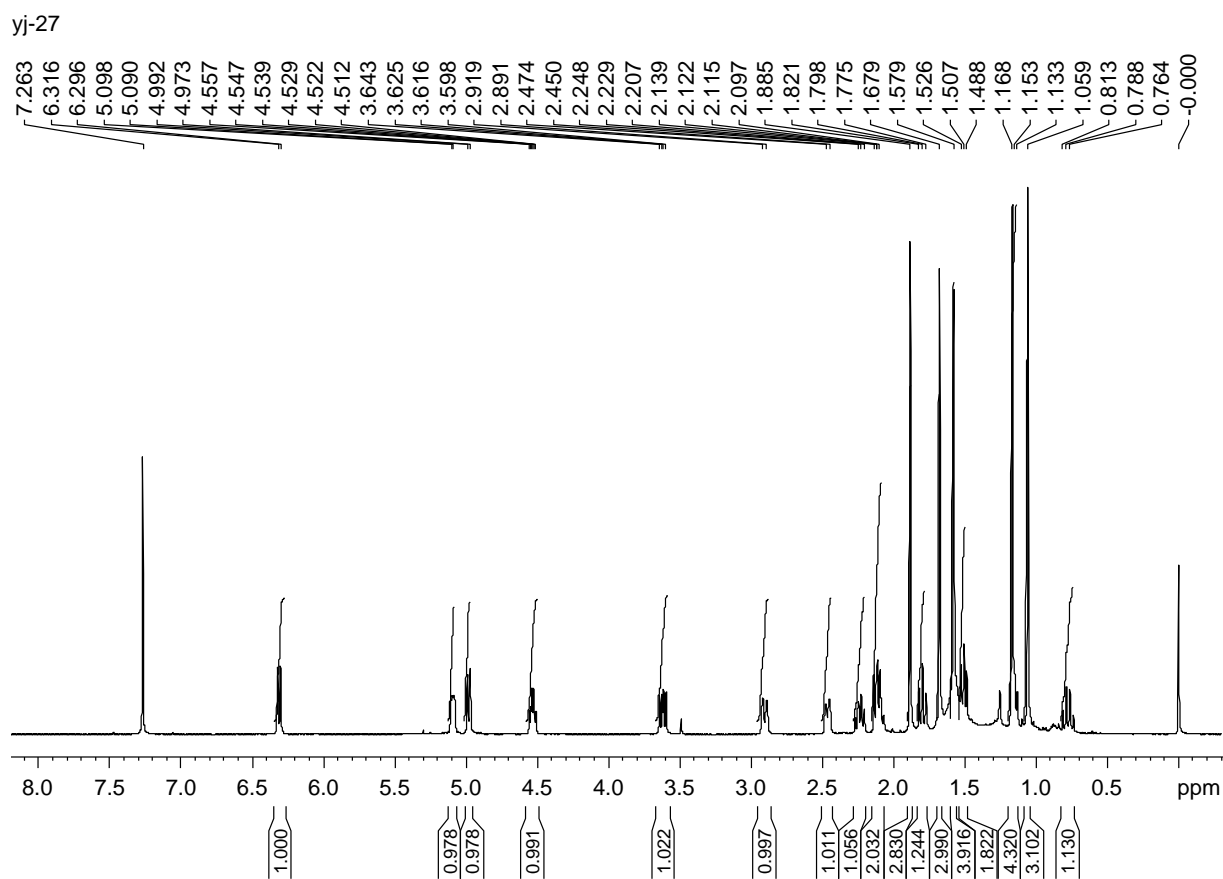**Figure S2.**  $^{13}\text{C}$  NMR spectrum (125 MHz) of compound **1** in  $\text{CDCl}_3$ .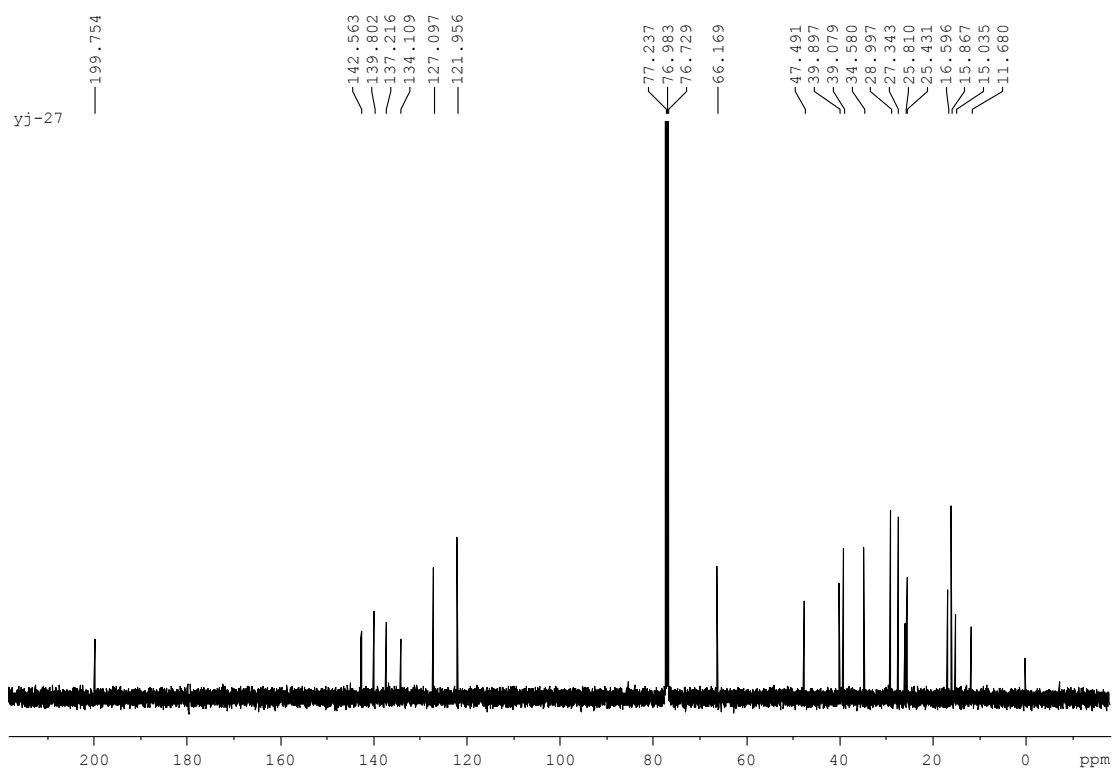

**Figure S3.** HSQC spectrum (500 MHz) of compound **1** in CDCl<sub>3</sub>.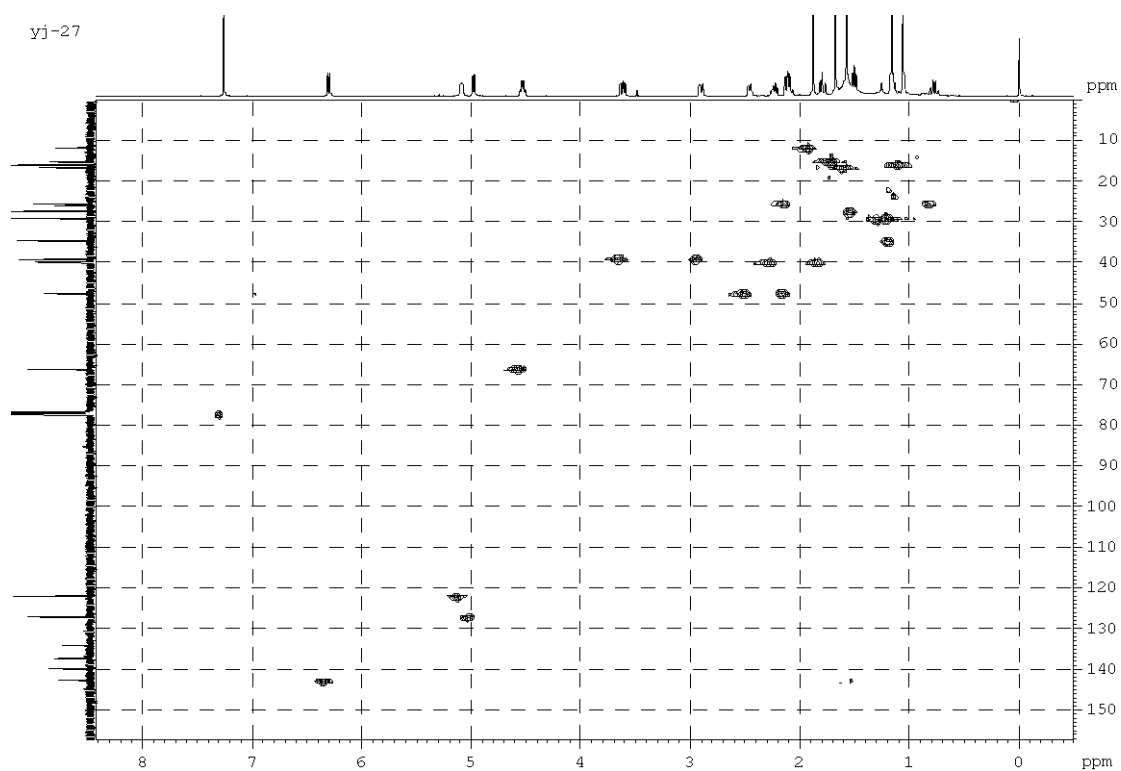**Figure S4.** HMBC spectrum (500 MHz) of compound **1** in CDCl<sub>3</sub>.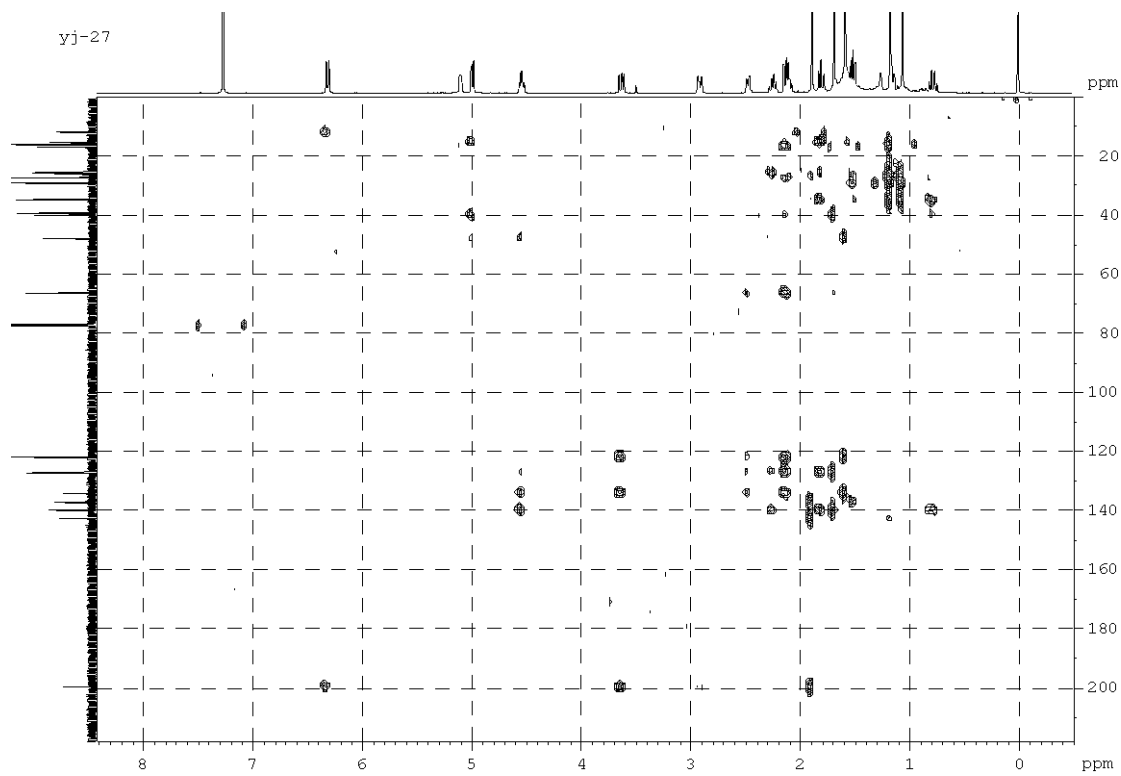

**Figure S5.** COSY spectrum (500 MHz) of compound **1** in CDCl<sub>3</sub>.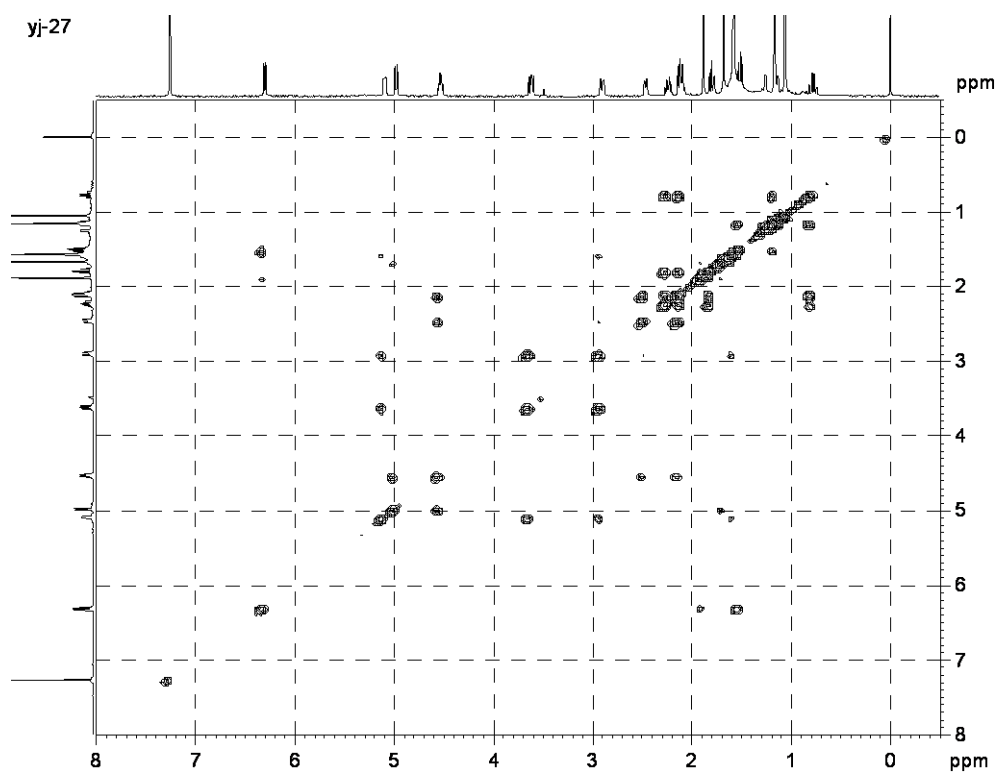**Figure S6.** NOESY spectrum (500 MHz) of compound **1** in CDCl<sub>3</sub>.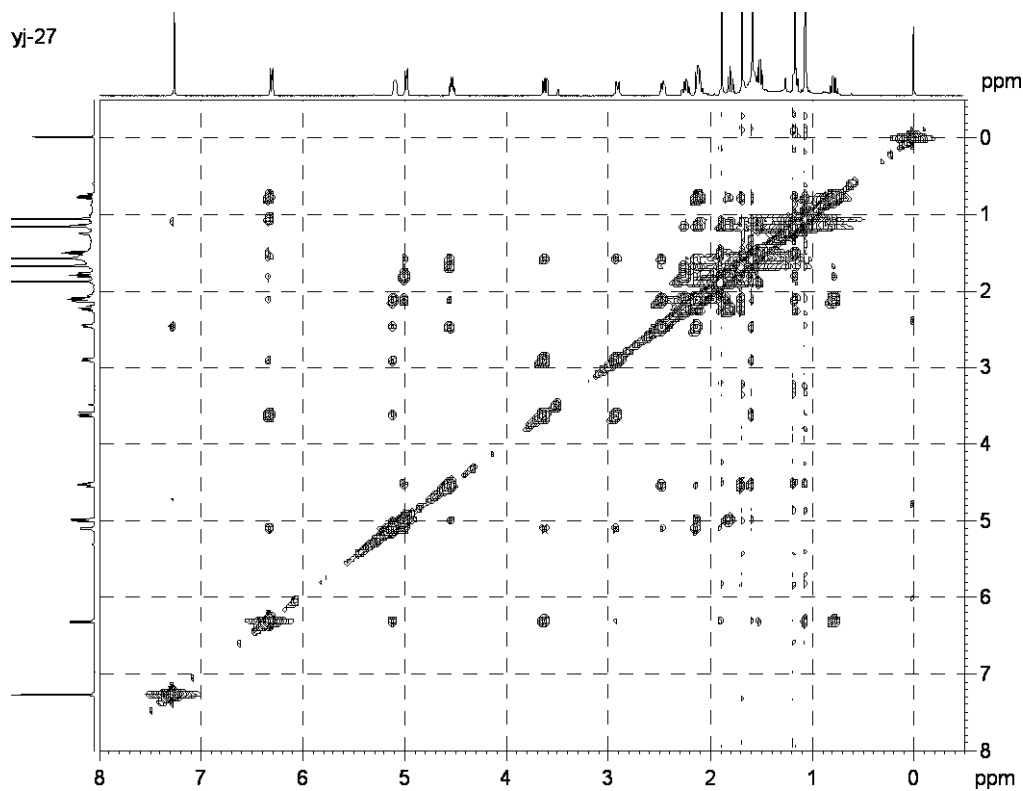

Figure S7. IR spectrum of compound 1.

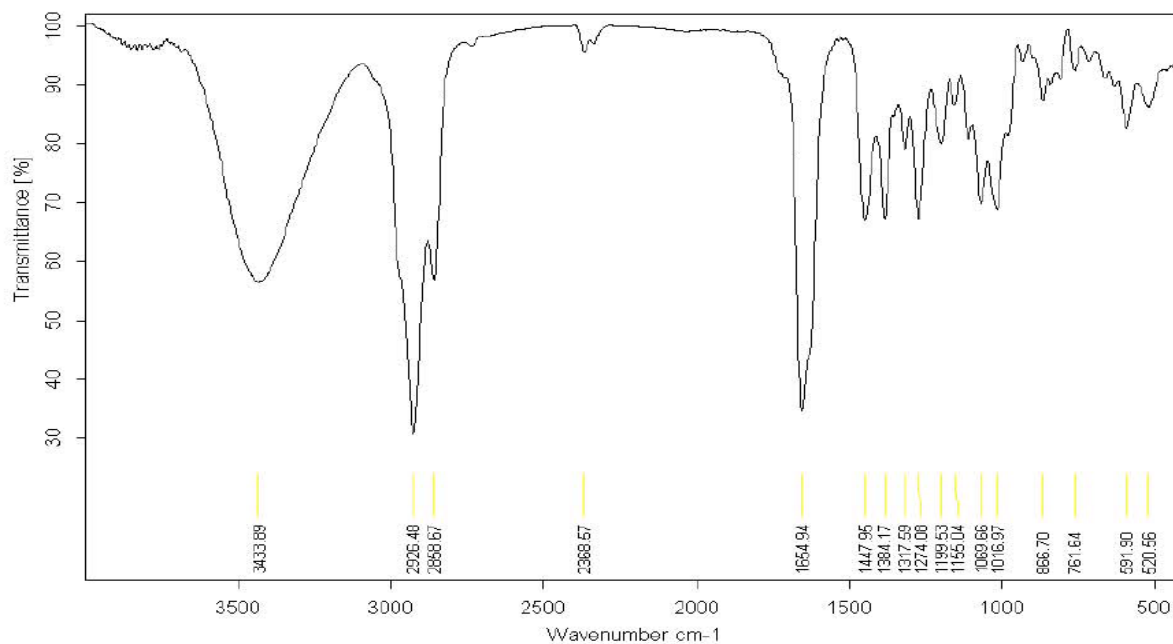

Figure S8. HR-ESIMS spectrum of compound 1.

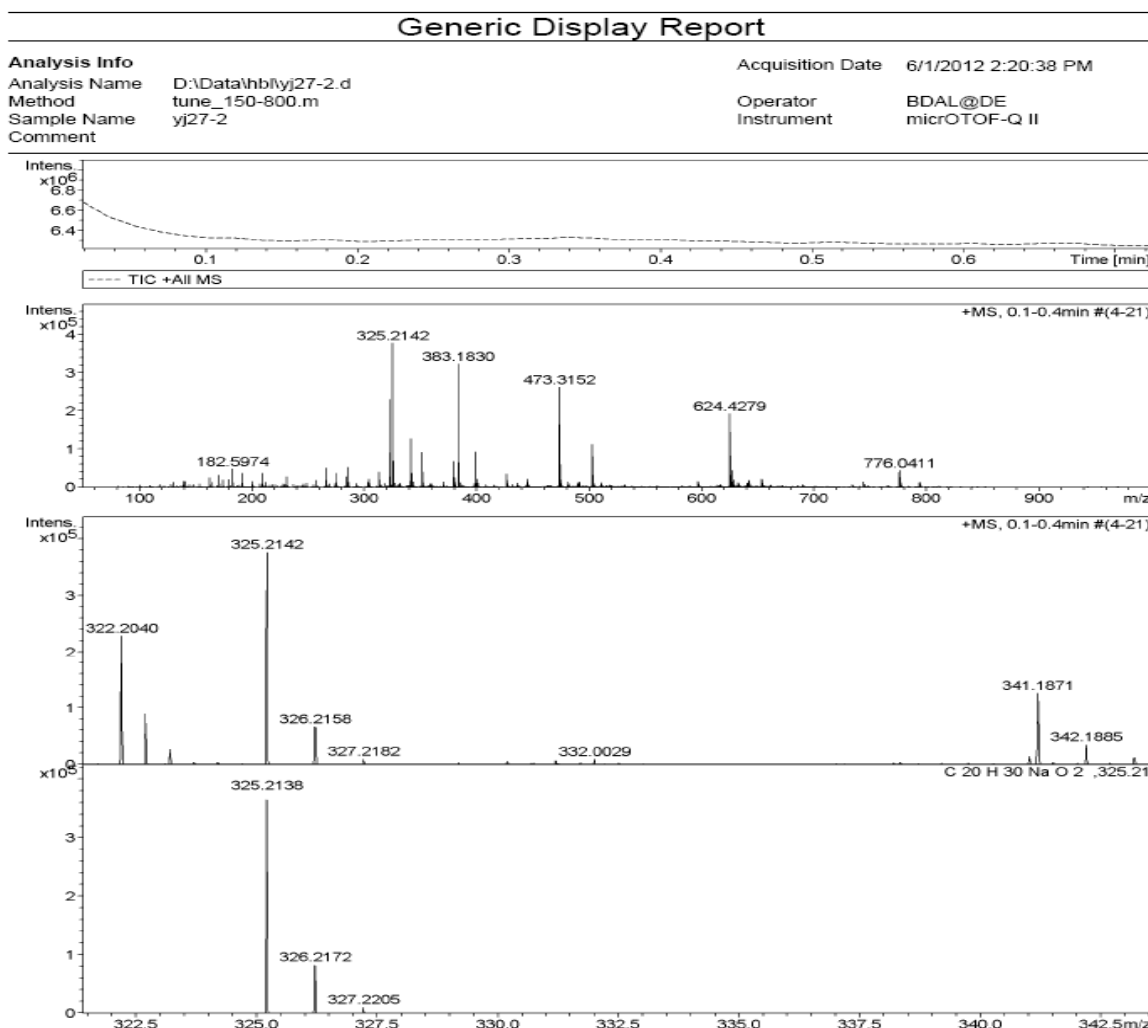

**Figure S9.**  $^1\text{H}$  NMR spectrum (500 MHz) of compound **2** in  $\text{CDCl}_3$ .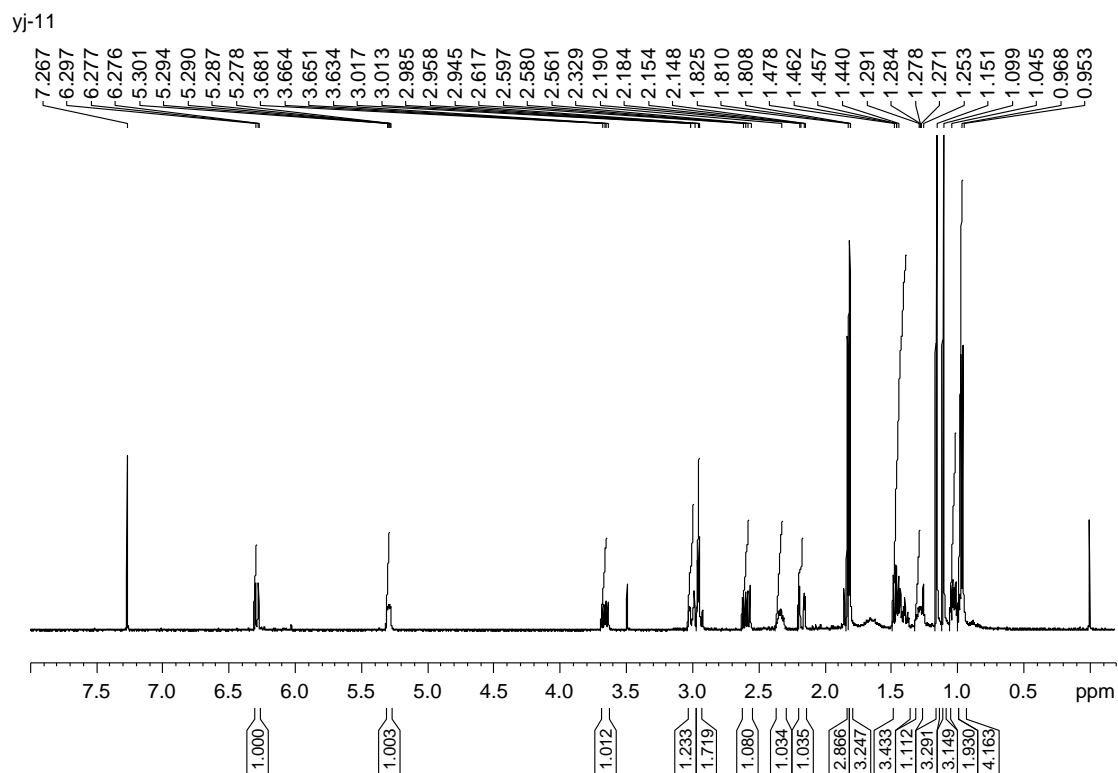**Figure S10.**  $^{13}\text{C}$  NMR spectrum (125 MHz) of compound **2** in  $\text{CDCl}_3$ .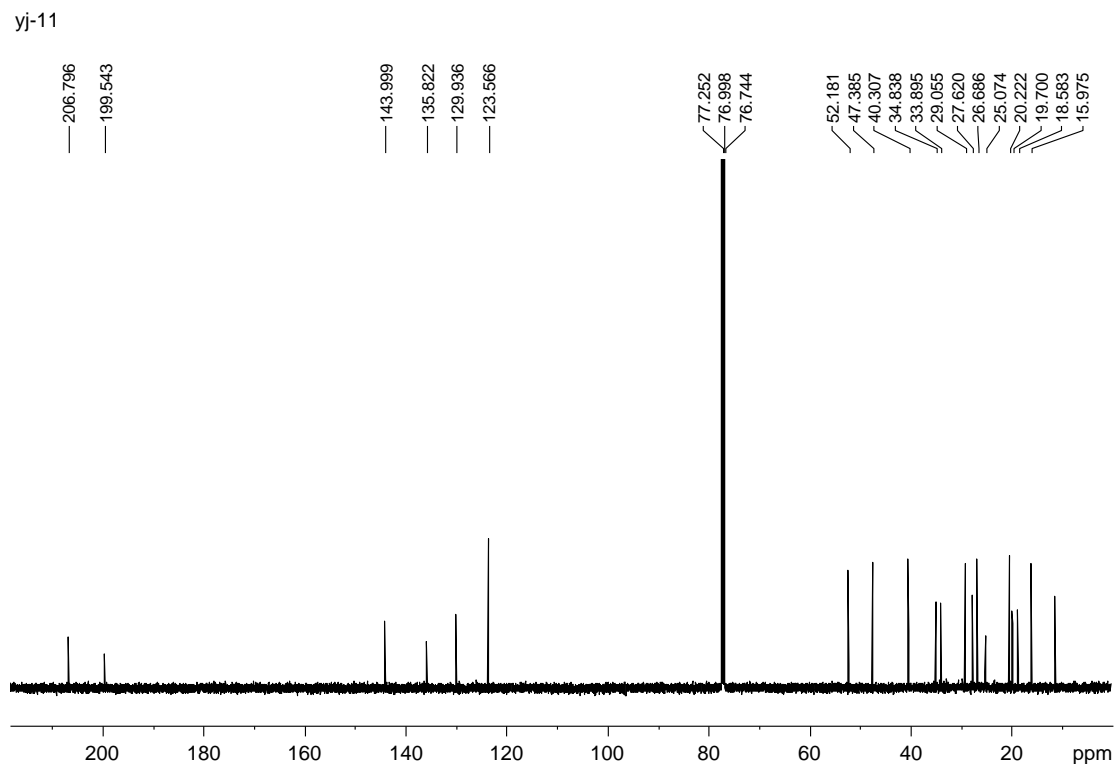

**Figure S11.** HSQC spectrum (500 MHz) of compound **2** in CDCl<sub>3</sub>.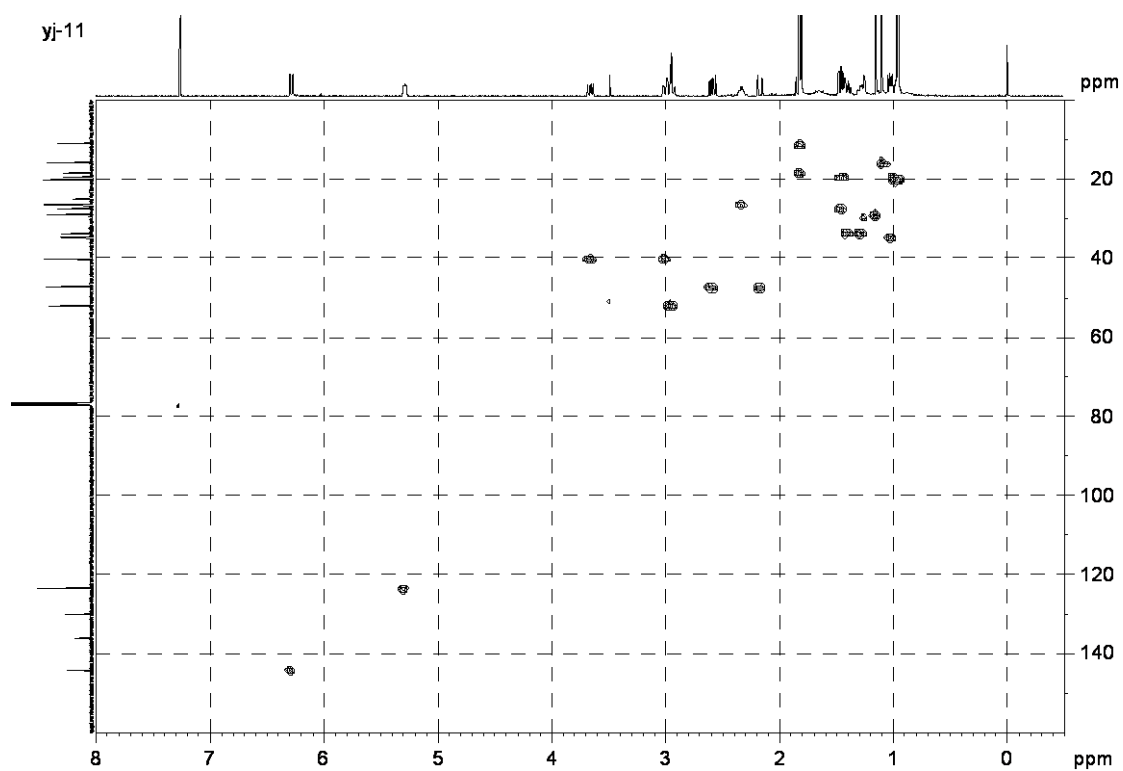**Figure S12.** HMBC spectrum (500 MHz) of compound **2** in CDCl<sub>3</sub>.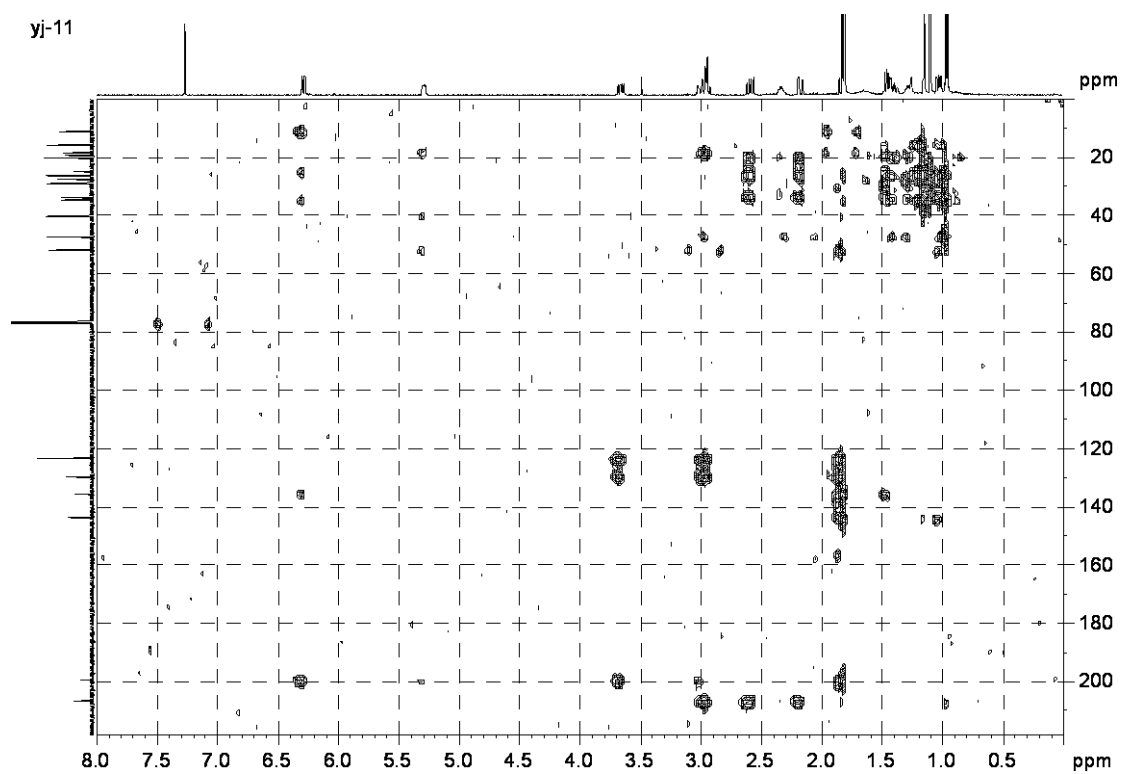



**Figure S13.** COSY spectrum (500 MHz) of compound **2** in CDCl<sub>3</sub>.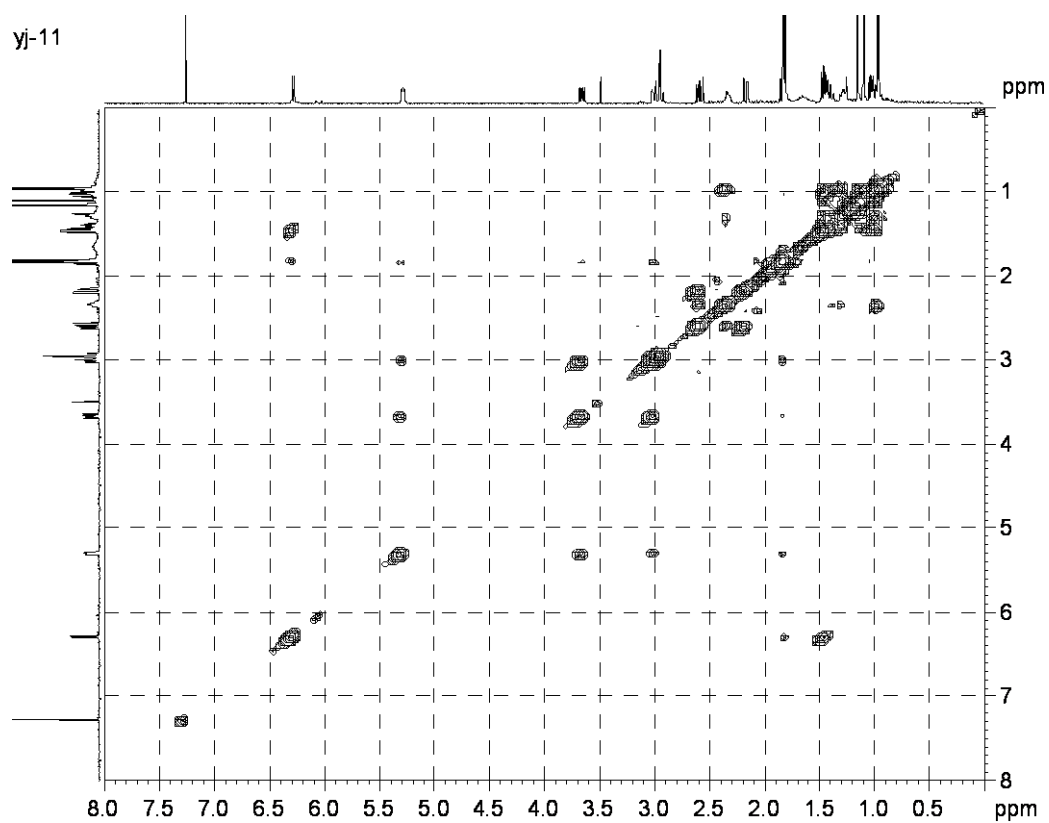**Figure S14.** NOESY spectrum (500 MHz) of compound **2** in CDCl<sub>3</sub>.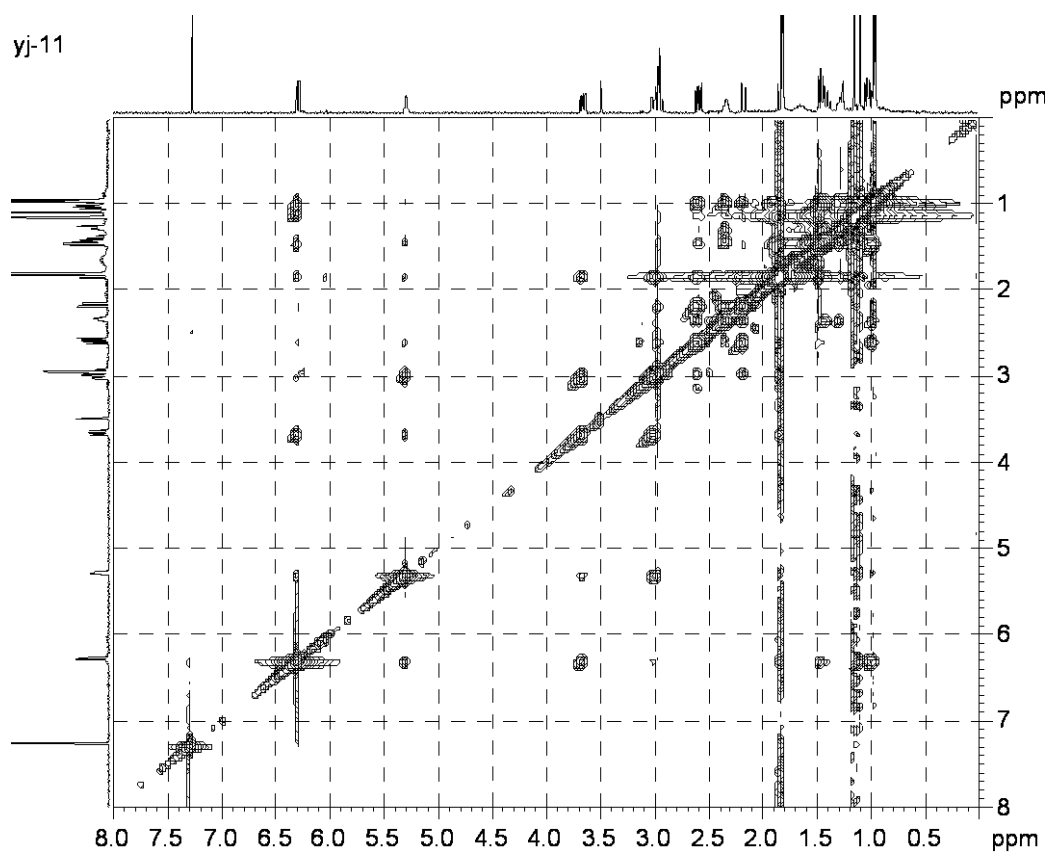

Figure S15. IR spectrum of compound 2.

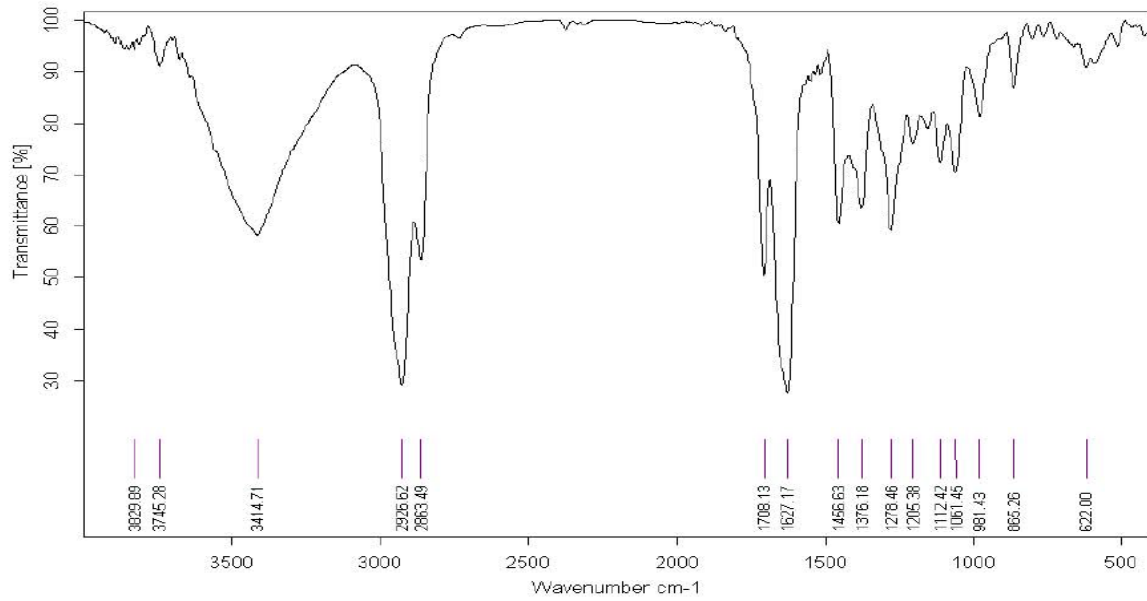

Figure S16. HR-ESIMS spectrum of compound 2.

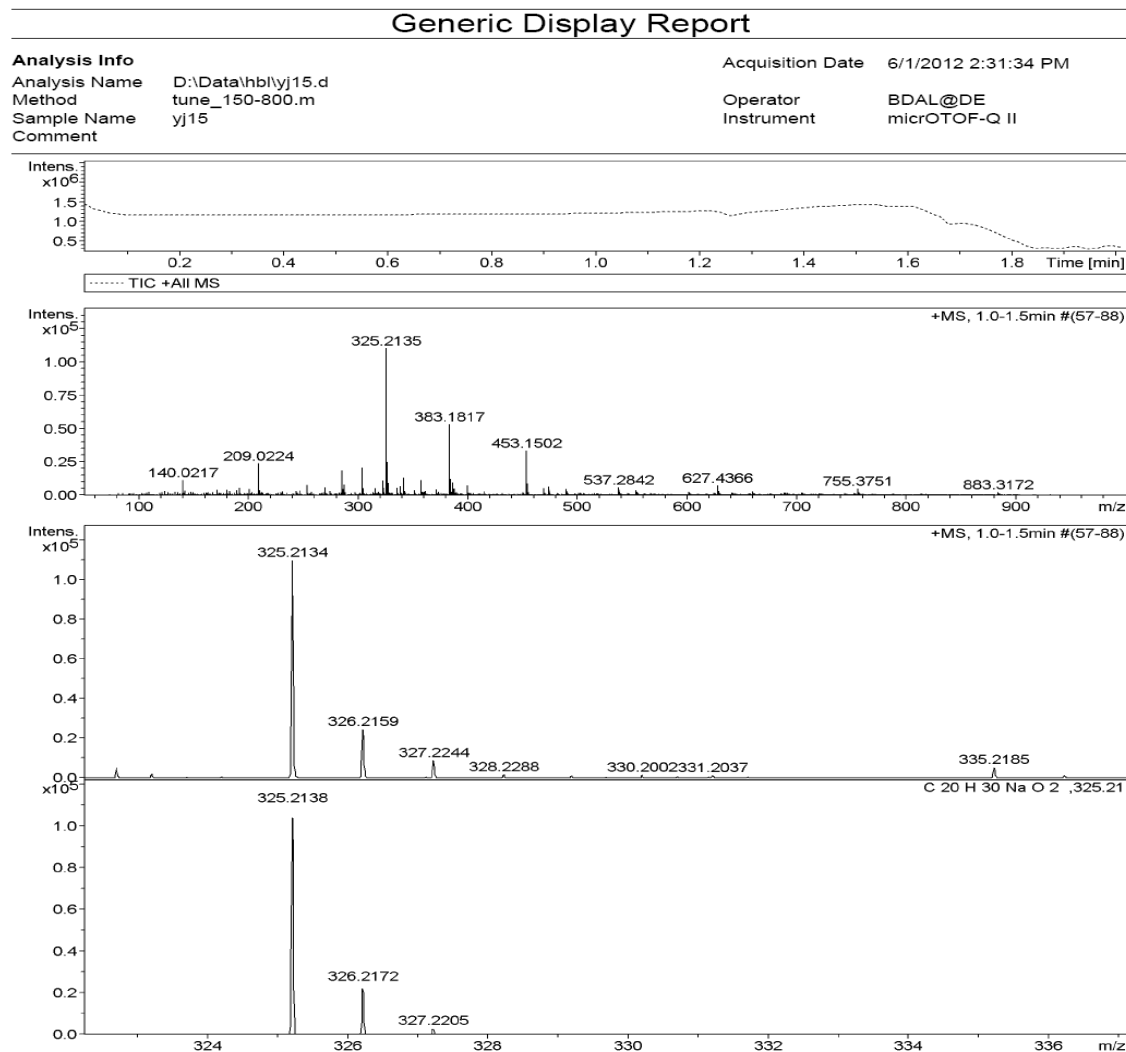

**Figure S17.**  $^1\text{H}$  NMR spectrum (500 MHz) of compound **3** in  $\text{CDCl}_3$ .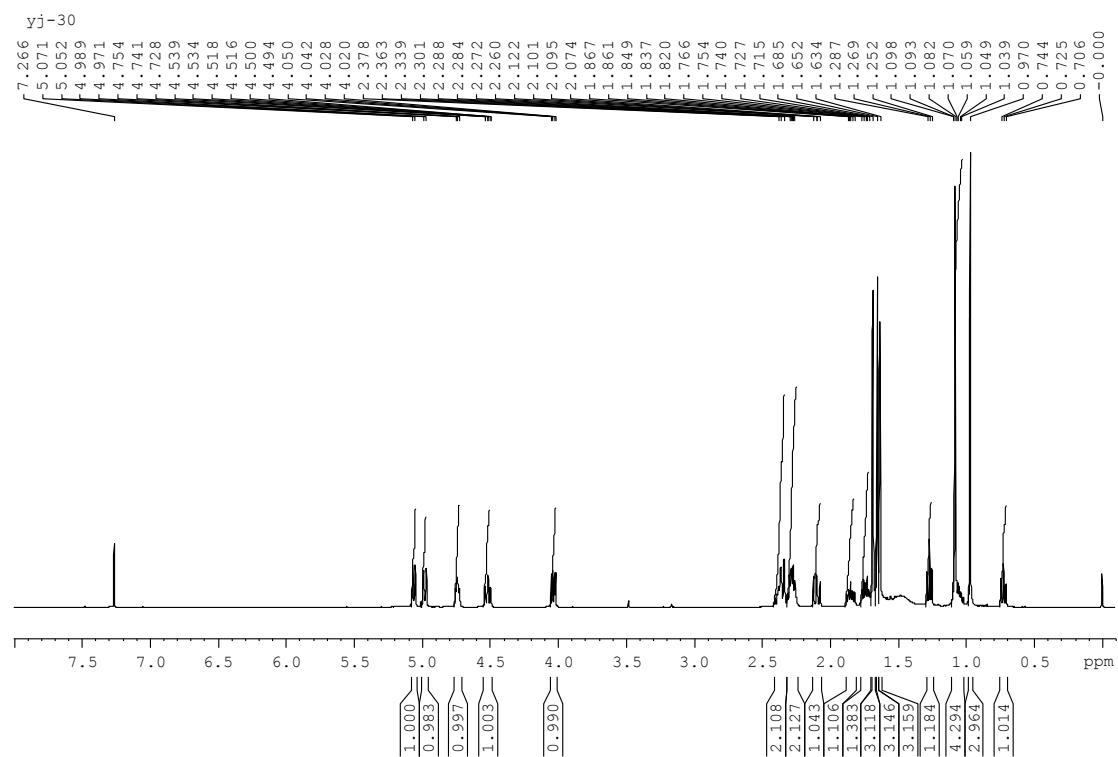**Figure S18.**  $^{13}\text{C}$  NMR spectrum (125 MHz) of compound **3** in  $\text{CDCl}_3$ .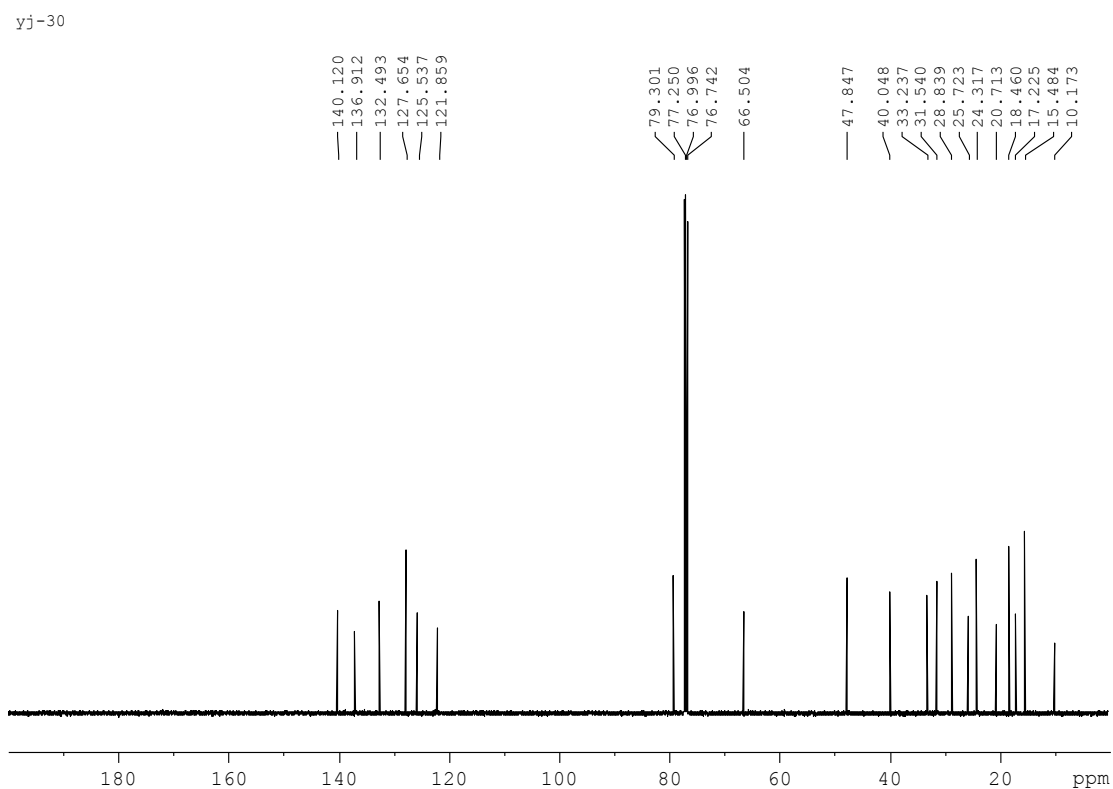

**Figure S19.** HSQC spectrum (500 MHz) of compound **3** in  $\text{CDCl}_3$ .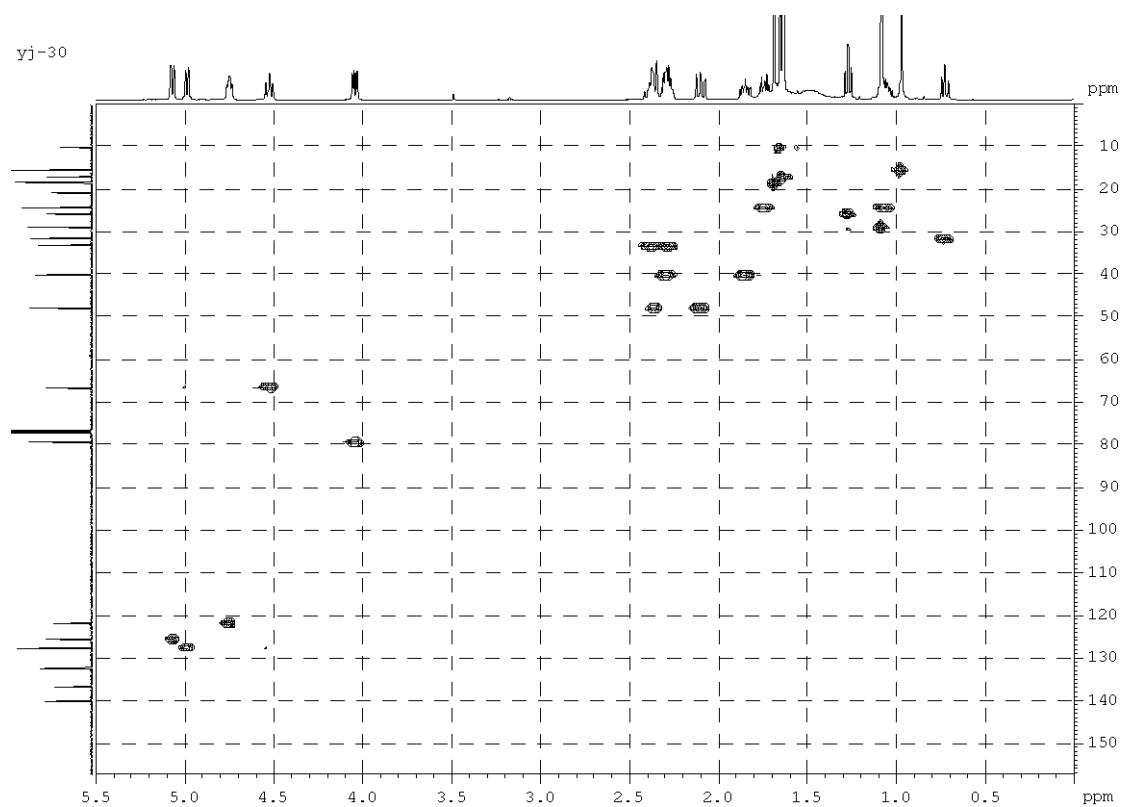**Figure S20.** HMBC spectrum (500 MHz) of compound **3** in  $\text{CDCl}_3$ .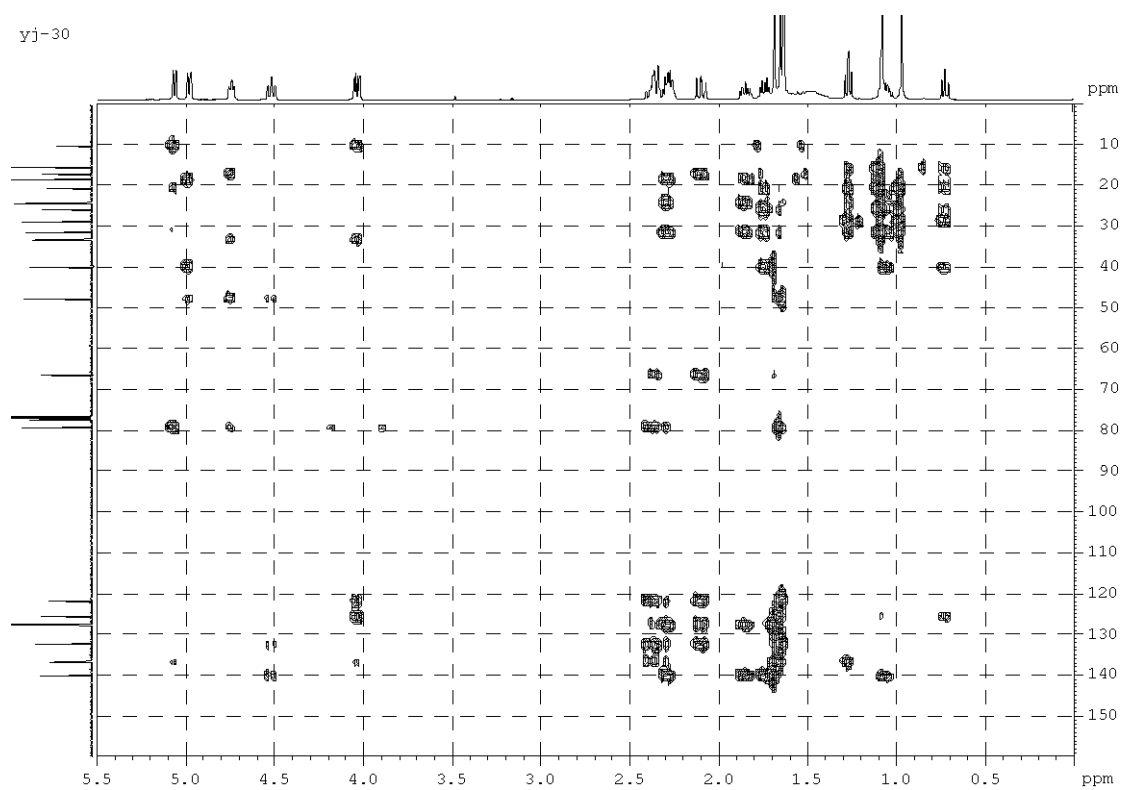

**Figure S21.** COSY spectrum (500 MHz) of compound **3** in CDCl<sub>3</sub>.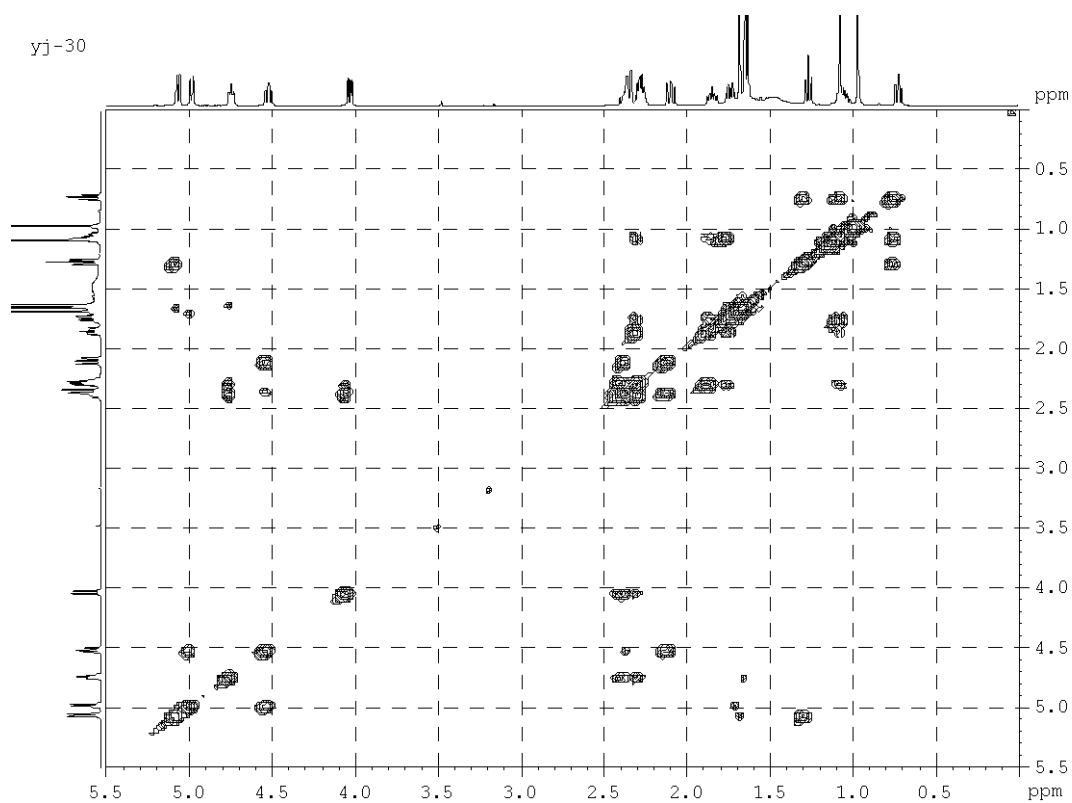**Figure S22.** NOESY spectrum (500 MHz) of compound **3** in CDCl<sub>3</sub>.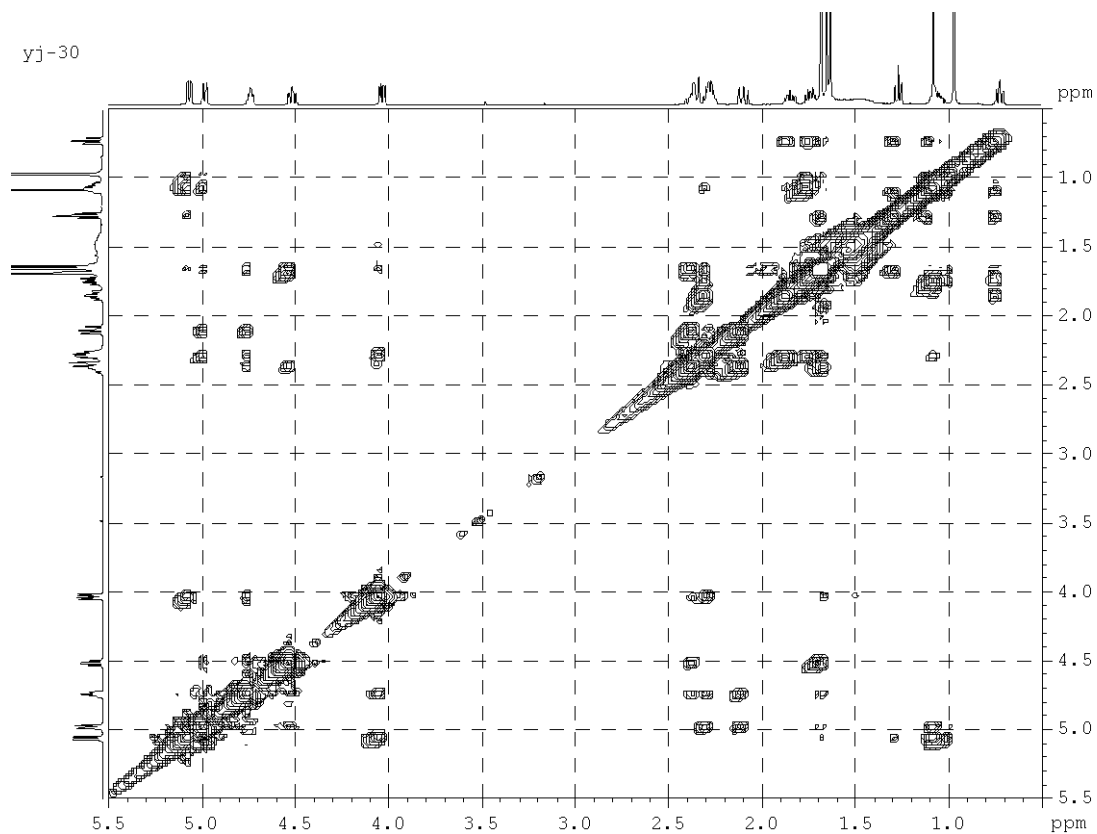

Figure S23. IR spectrum of compound 3.

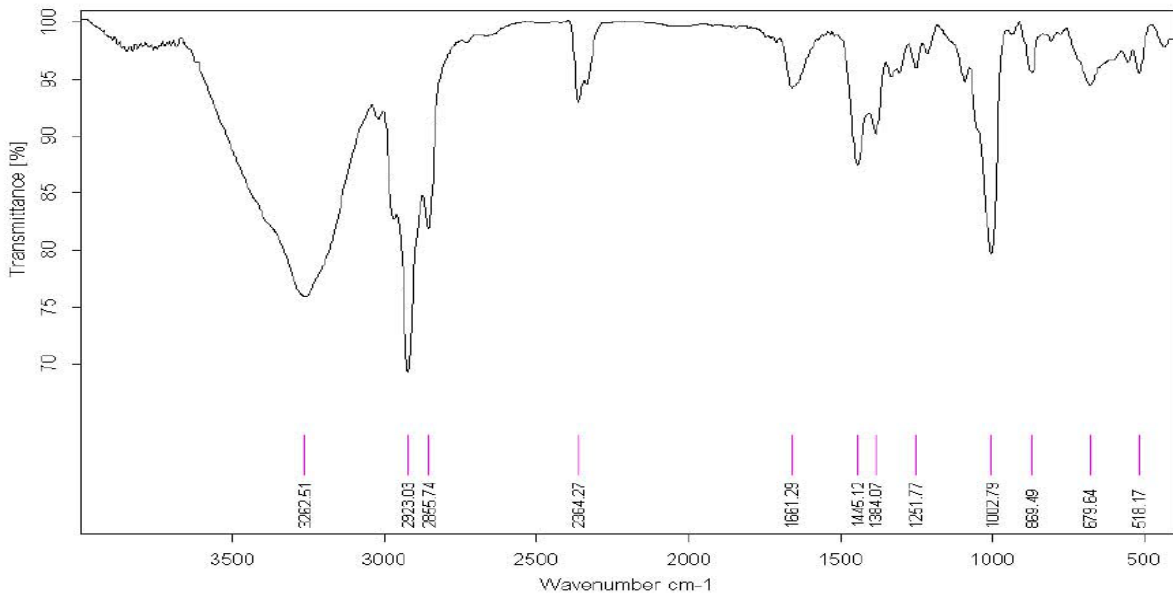

Figure S24. HR-ESIMS spectrum of compound 3.

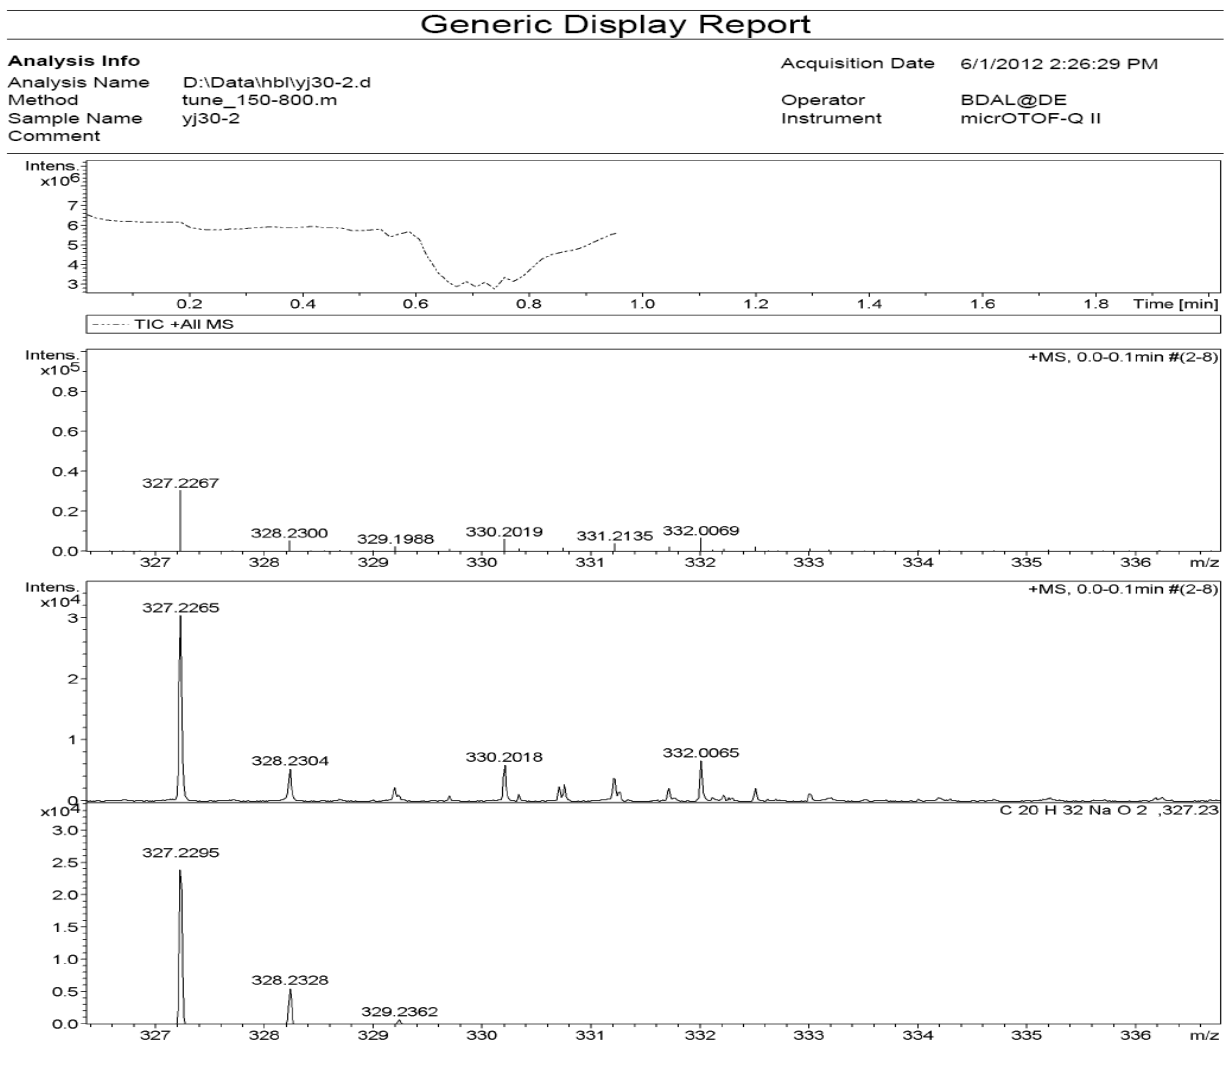

**Figure S25.**  $^1\text{H}$  NMR spectrum (500 MHz) of compound **4** in  $\text{CDCl}_3$ .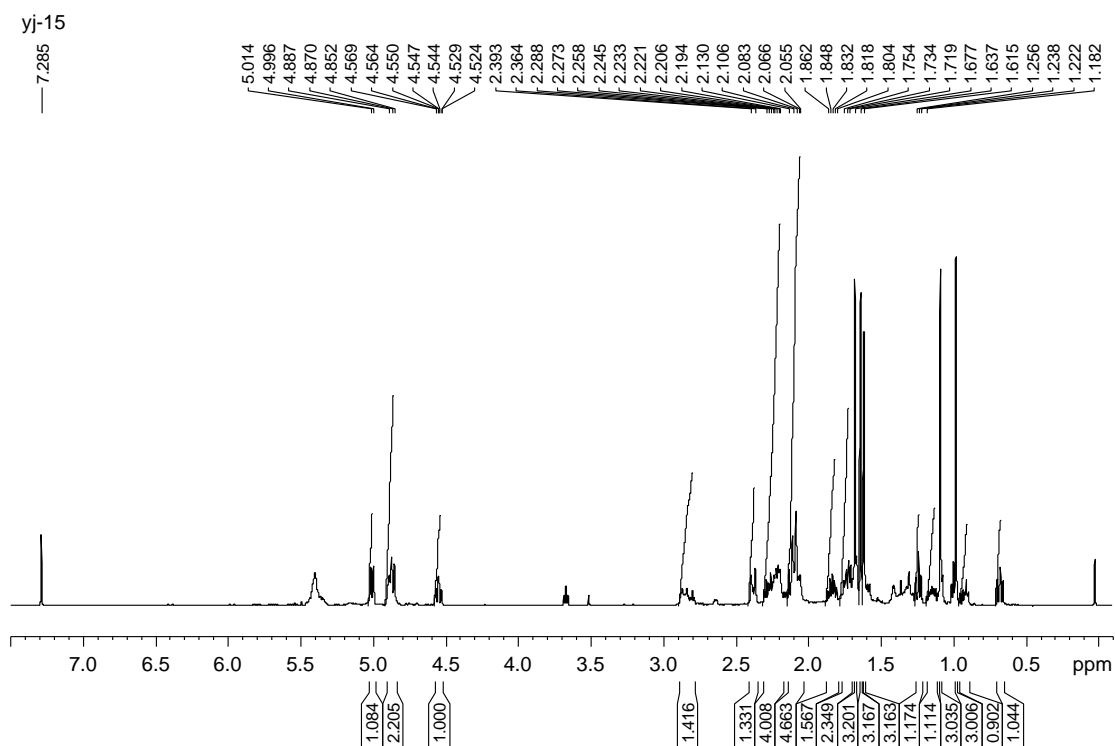**Figure S26.**  $^{13}\text{C}$  NMR spectrum (125 MHz) of compound **4** in  $\text{CDCl}_3$ .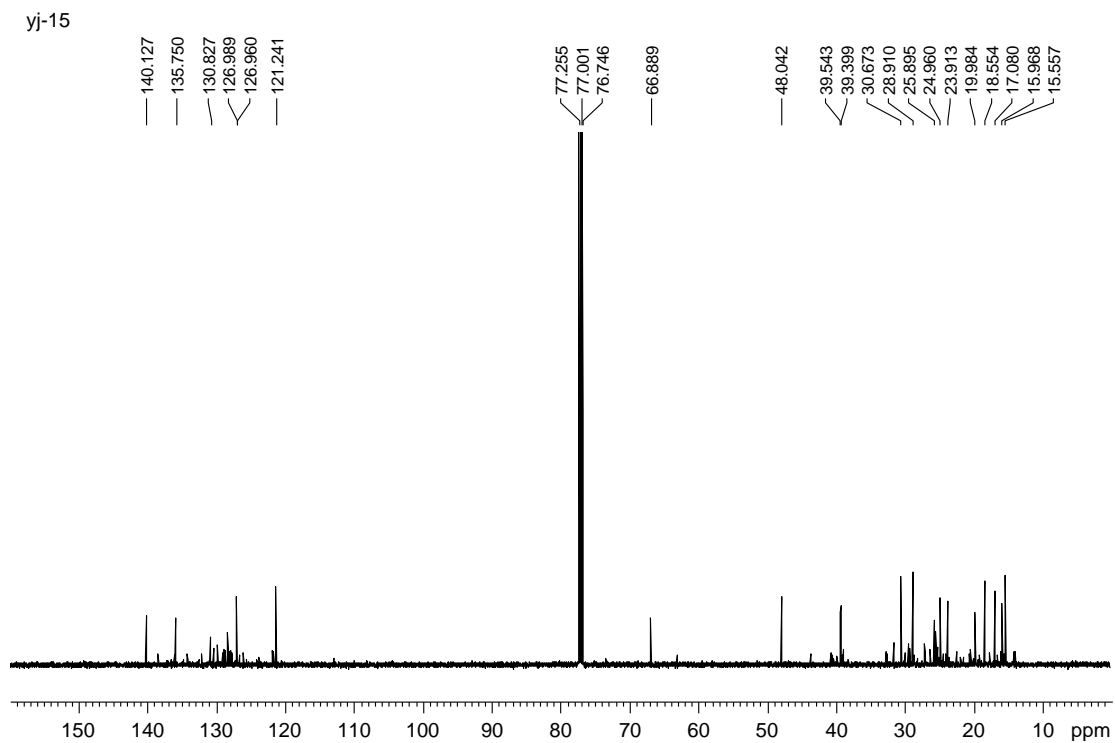

Figure S27. HSQC spectrum (500 MHz) of compound 4 in CDCl<sub>3</sub>.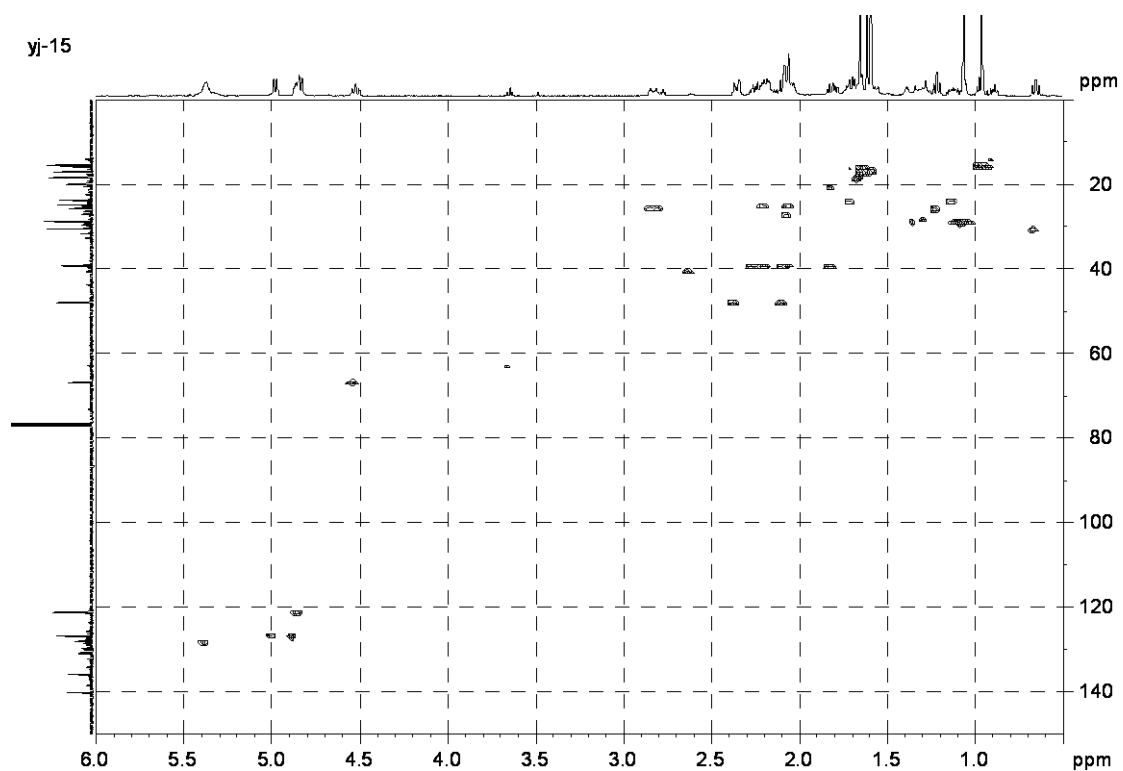Figure S28. HMBC spectrum (500 MHz) of compound 4 in CDCl<sub>3</sub>.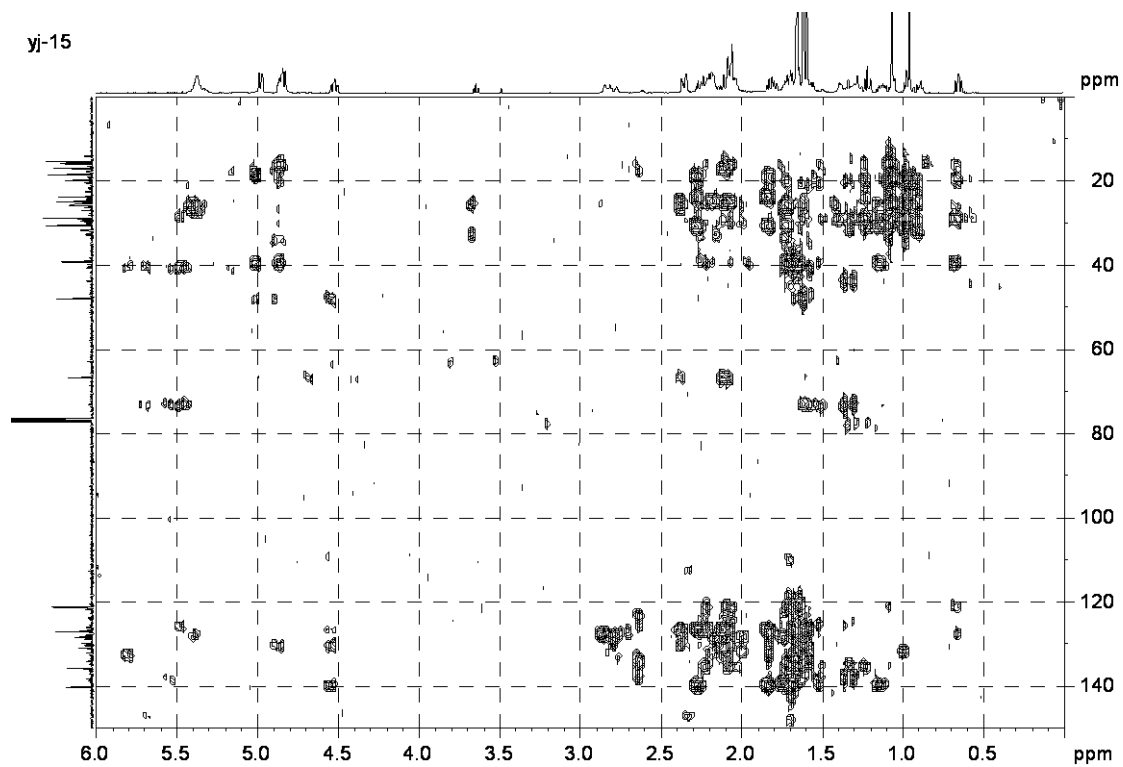



**Figure S29.** COSY spectrum (500 MHz) of compound **4** in CDCl<sub>3</sub>.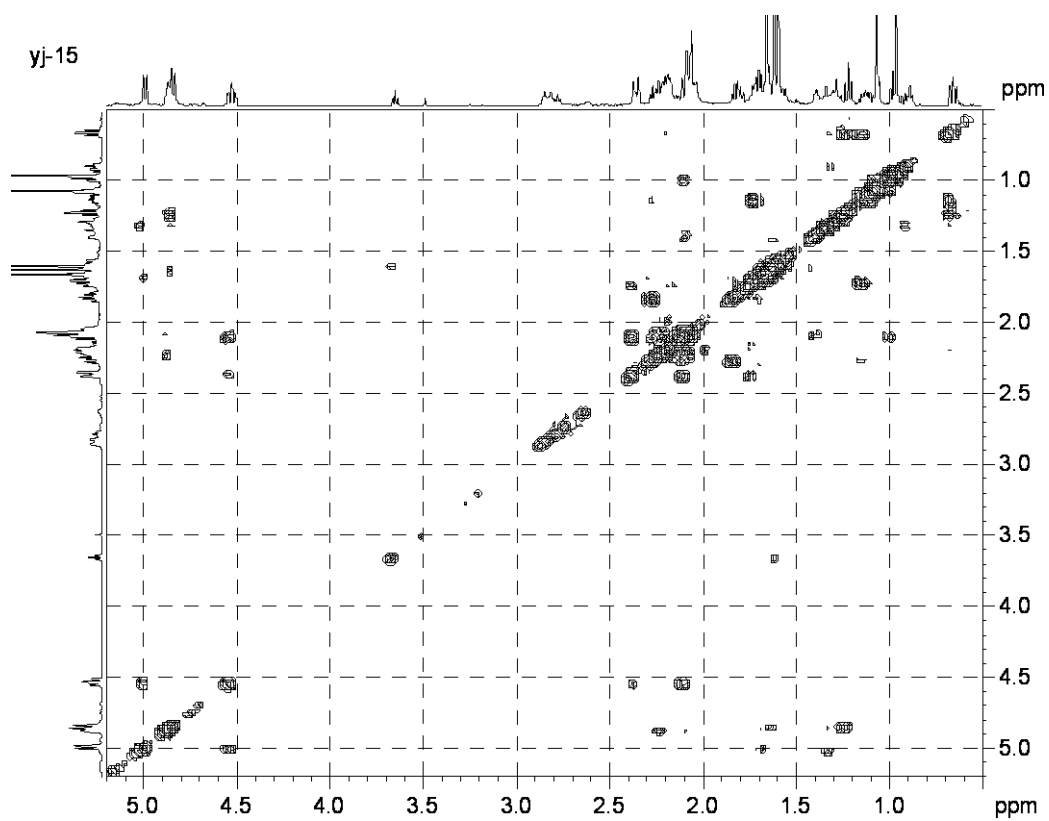**Figure S30.** NOESY spectrum (500 MHz) of compound **4** in CDCl<sub>3</sub>.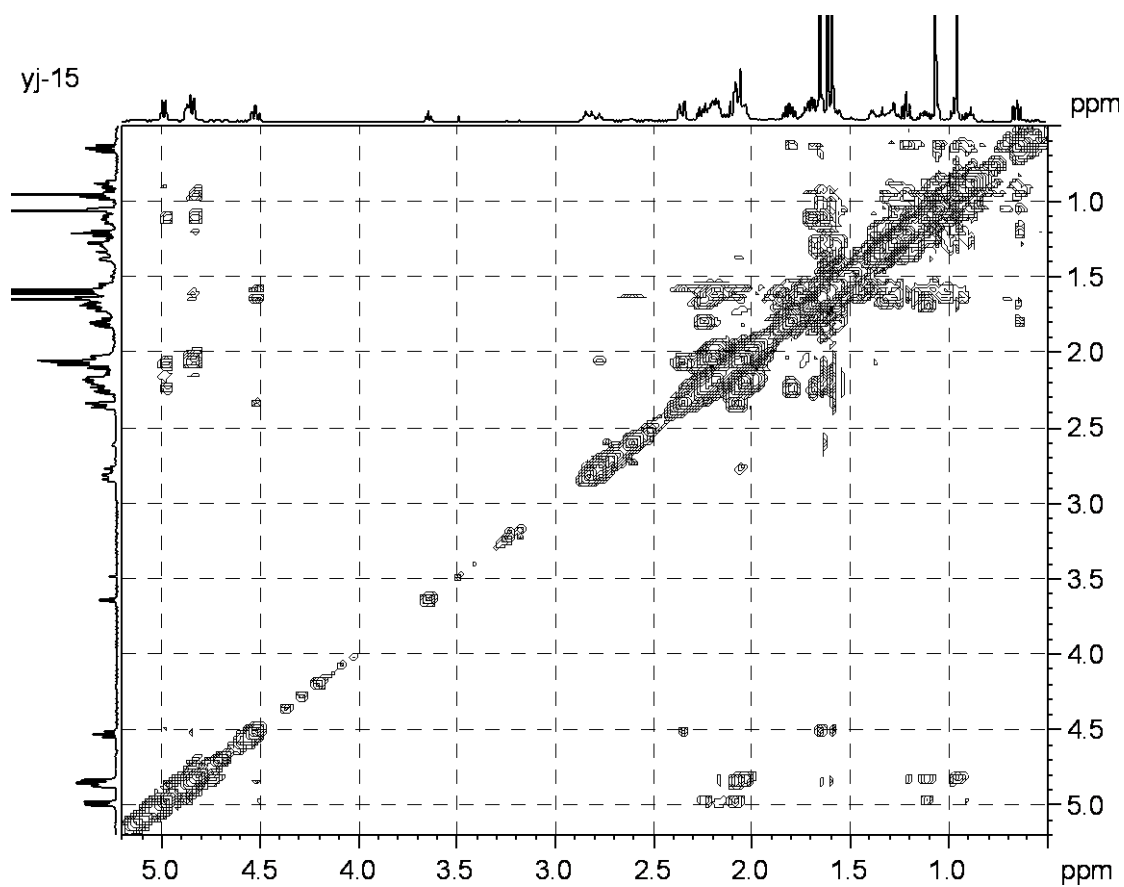

Figure S31. IR spectrum of compound 4.

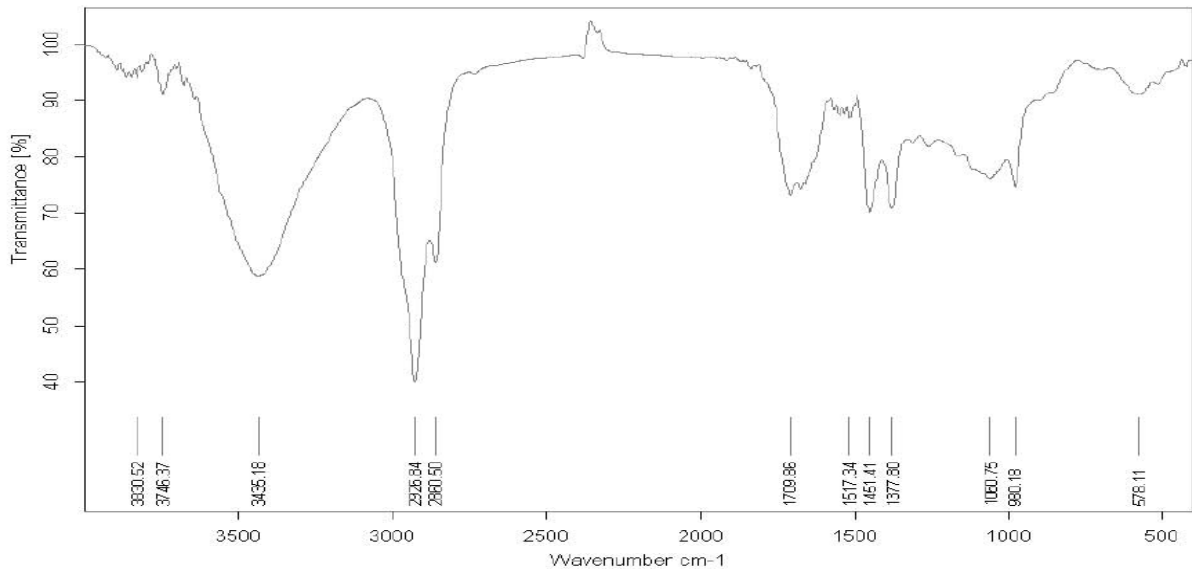

Figure S32. HR-ESIMS spectrum of compound 4.

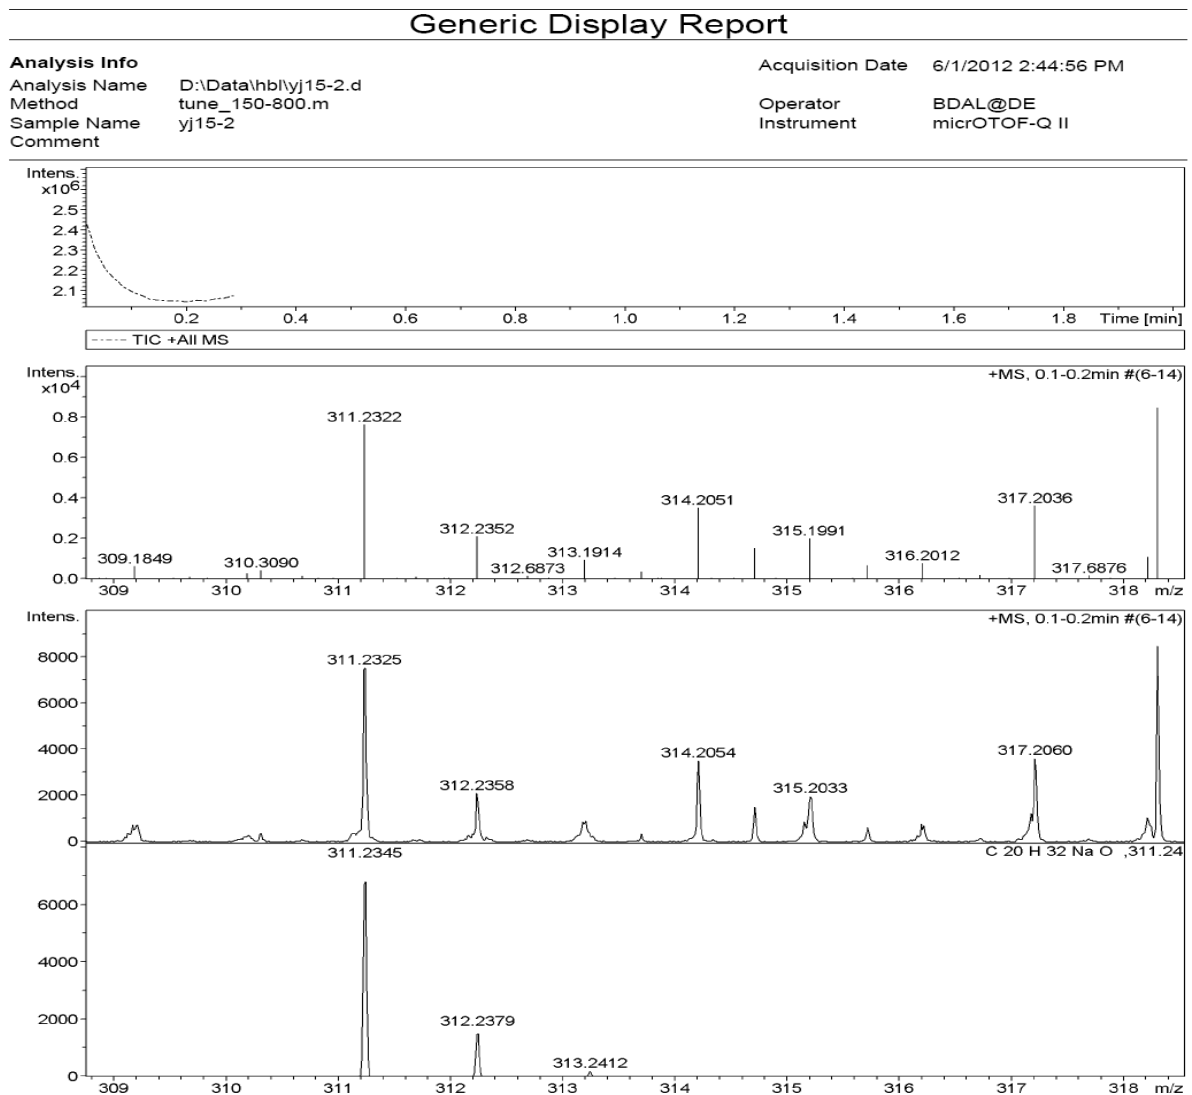

**Figure S33.**  $^1\text{H}$  NMR spectrum (500 MHz) of compound **5** in  $\text{CDCl}_3$ .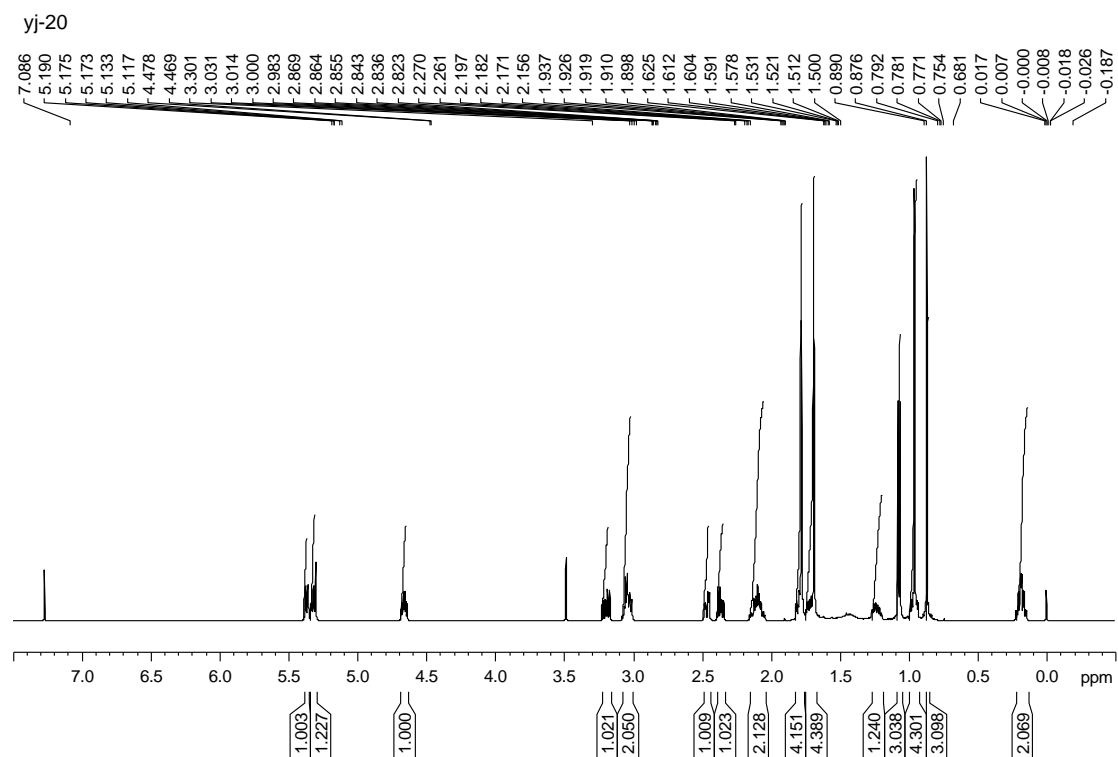**Figure S34.**  $^{13}\text{C}$  NMR spectrum (125 MHz) of compound **5** in  $\text{CDCl}_3$ .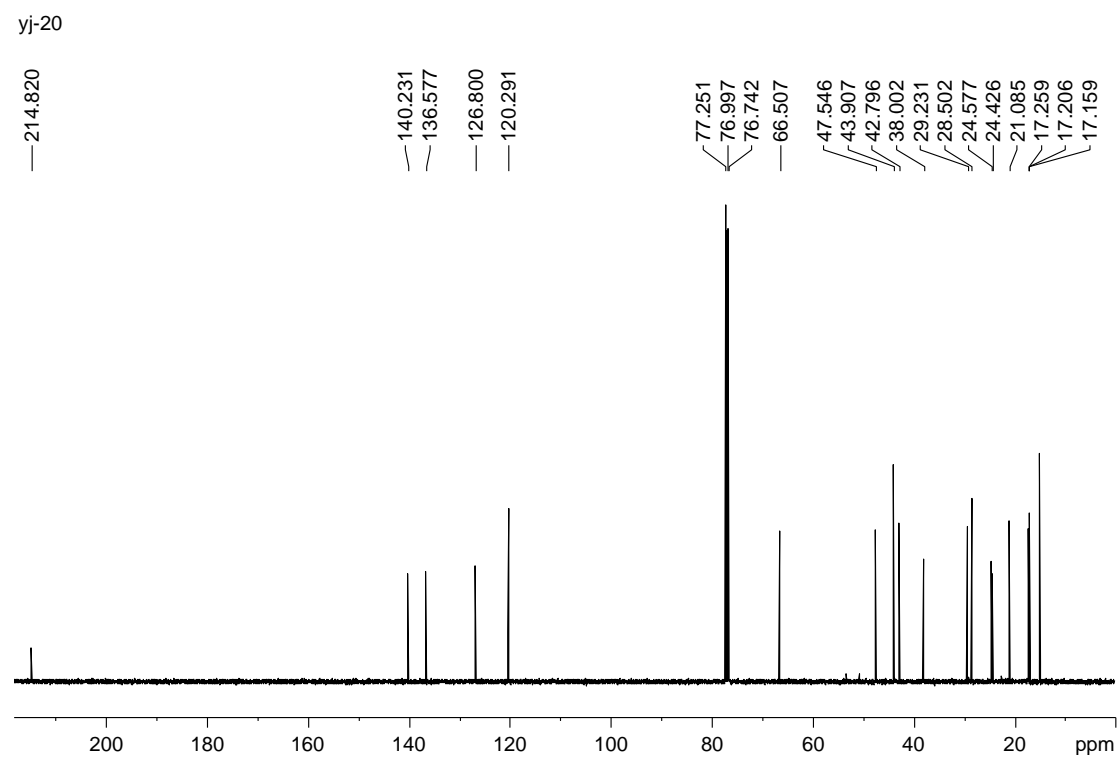

Figure S35. HSQC spectrum (500 MHz) of compound 5 in CDCl<sub>3</sub>.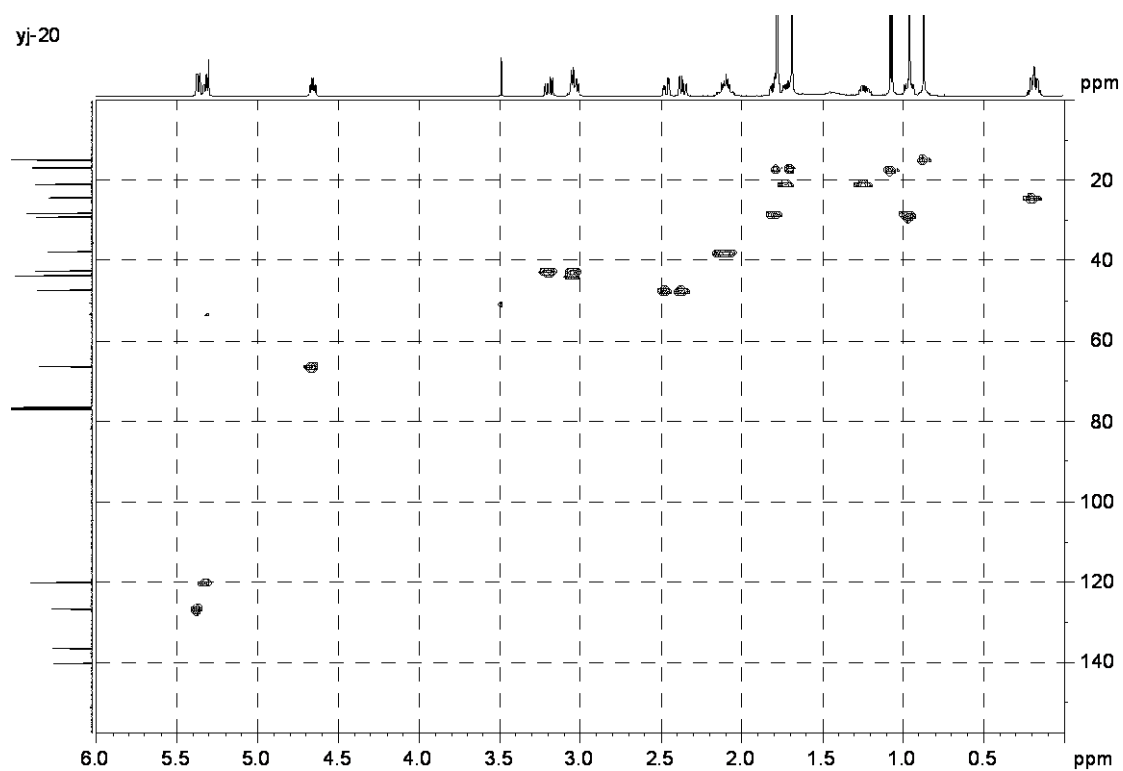Figure S36. HMBC spectrum (500 MHz) of compound 5 in CDCl<sub>3</sub>.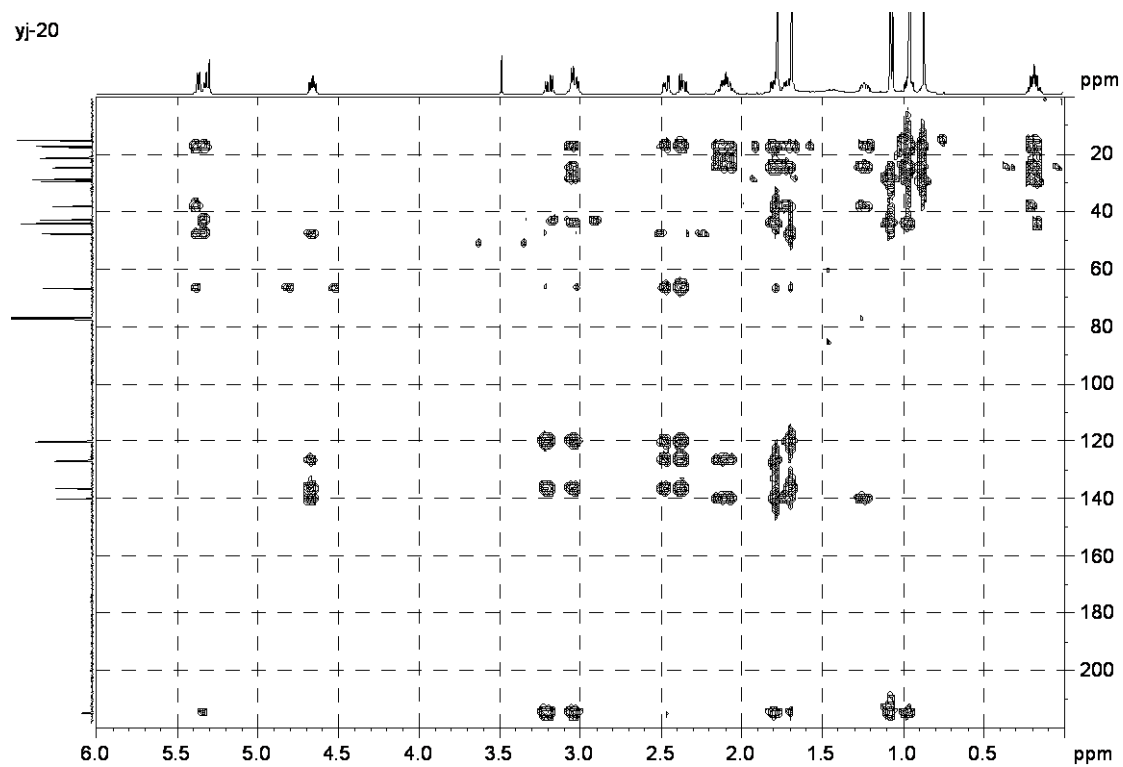

**Figure S37.** COSY spectrum (500 MHz) of compound **5** in CDCl<sub>3</sub>.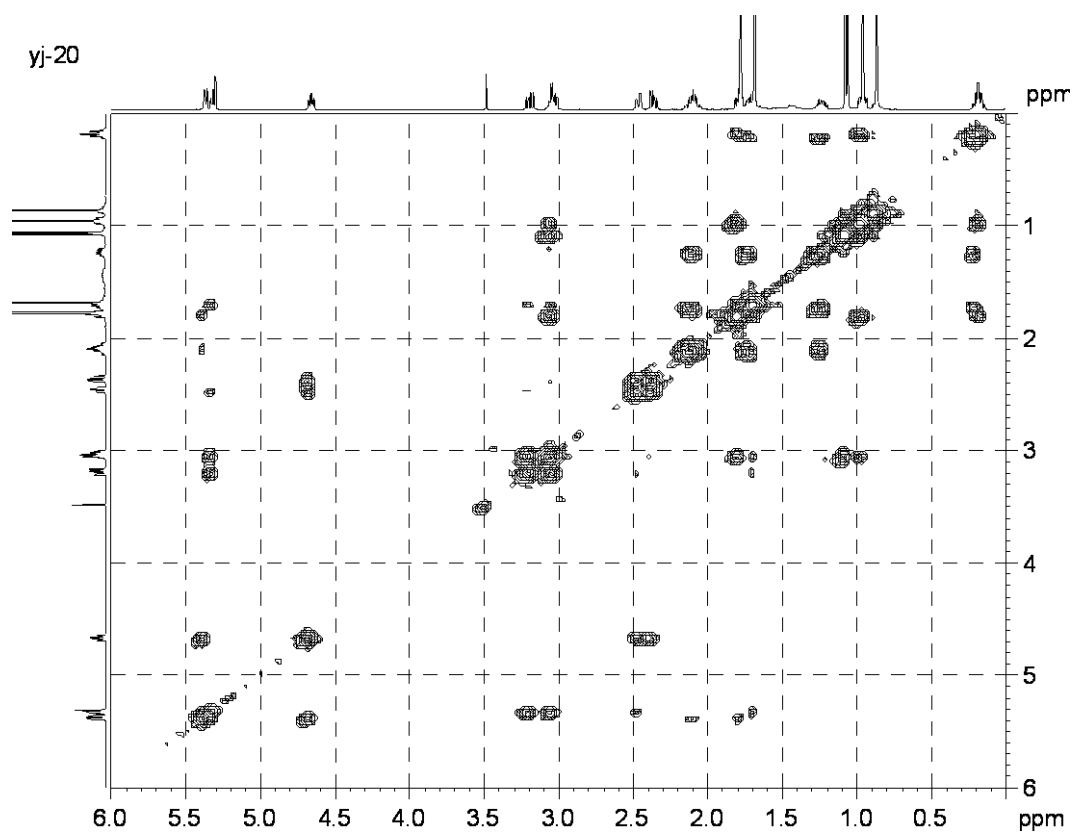**Figure S38.** NOESY spectrum (500 MHz) of compound **5** in CDCl<sub>3</sub>.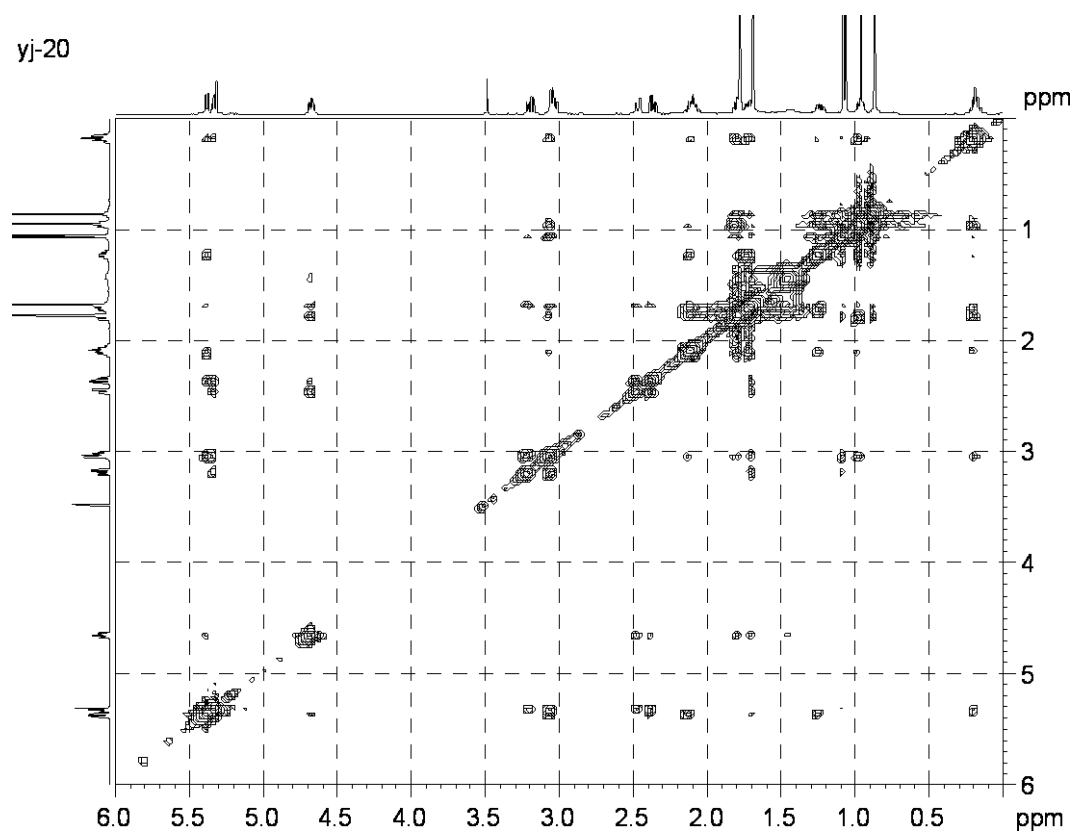

Figure S39. IR spectrum of compound 5.

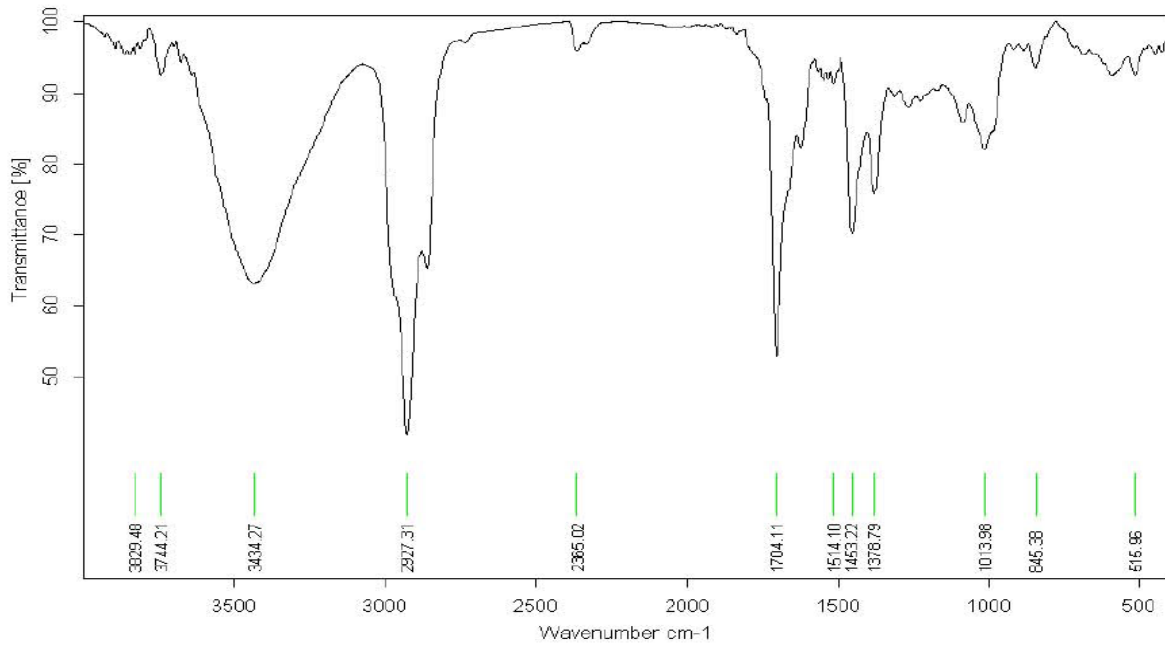

Figure S40. HR-ESIMS spectrum of compound 5.

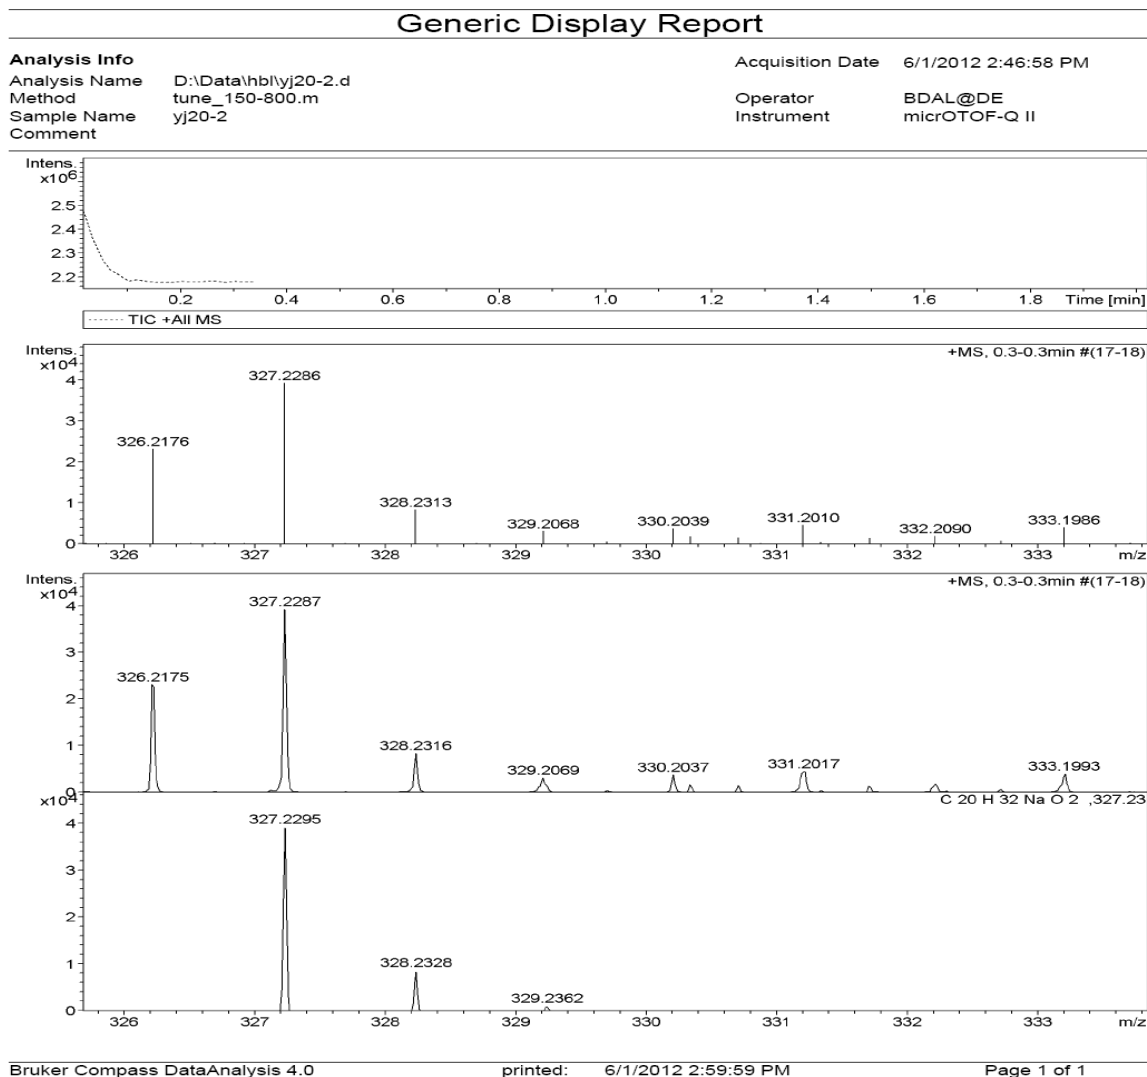

**Figure S41.**  $^1\text{H}$  NMR spectrum (500 MHz) of compound **6** in  $\text{CDCl}_3$ .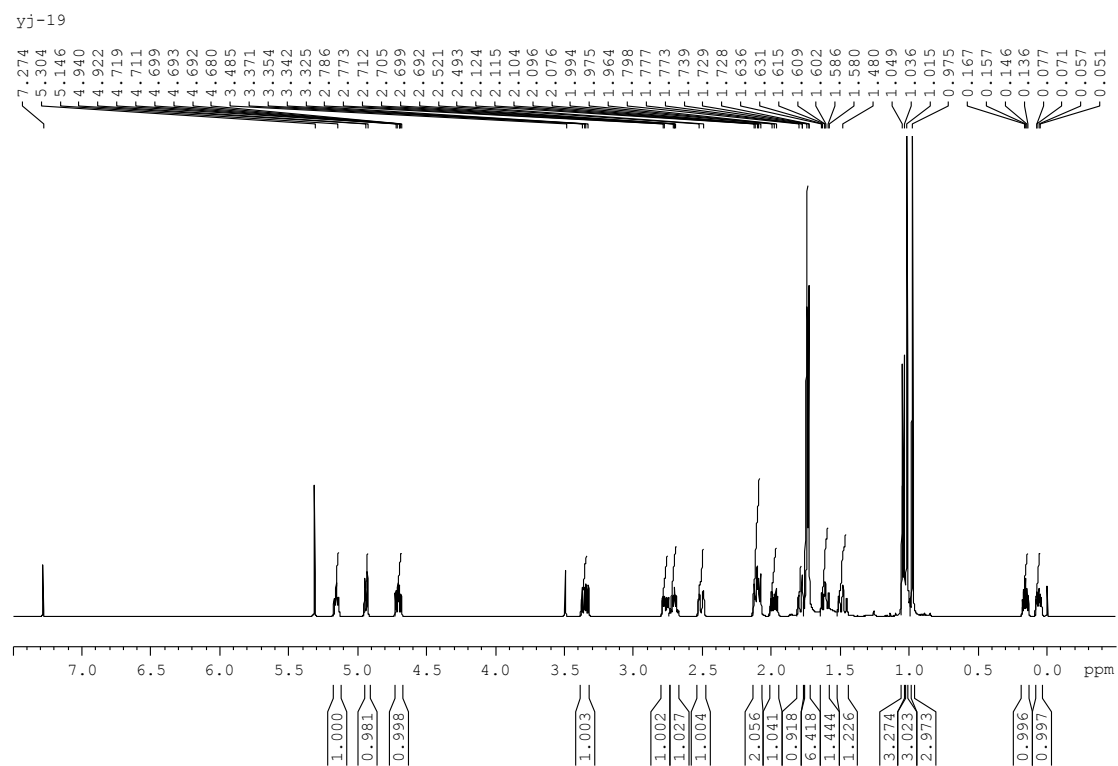**Figure S42.**  $^{13}\text{C}$  NMR spectrum (125 MHz) of compound **6** in  $\text{CDCl}_3$ .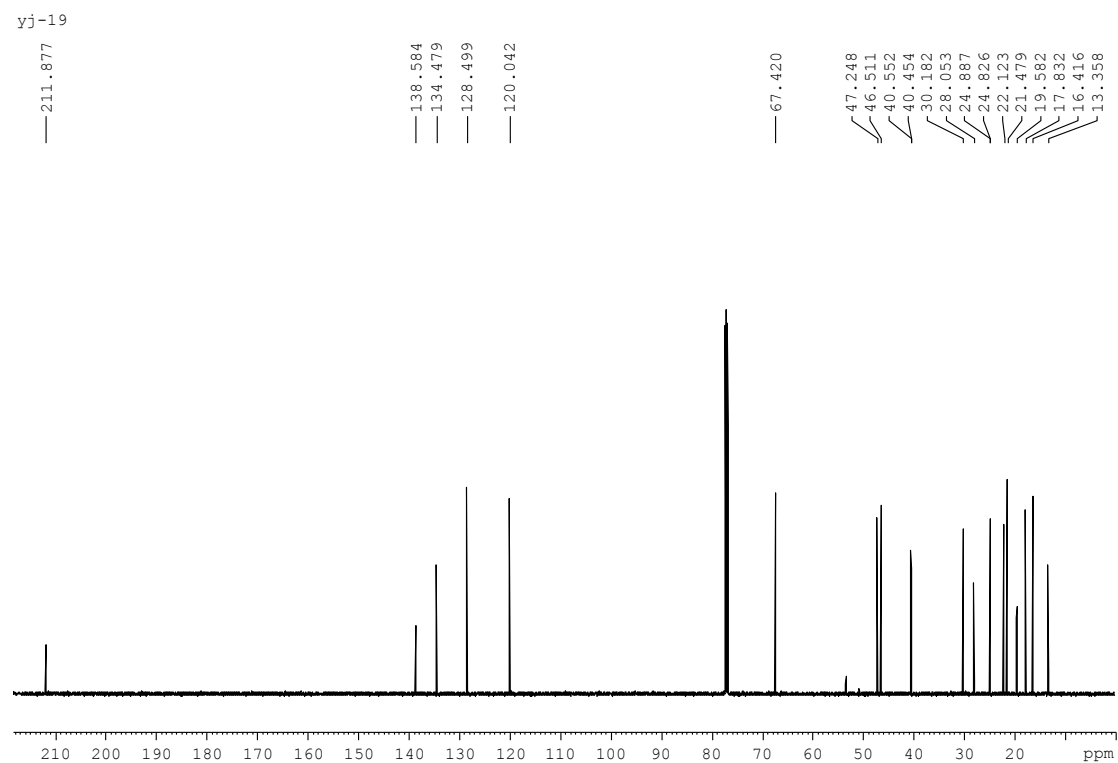

**Figure S43.** HSQC spectrum (500 MHz) of compound **6** in CDCl<sub>3</sub>.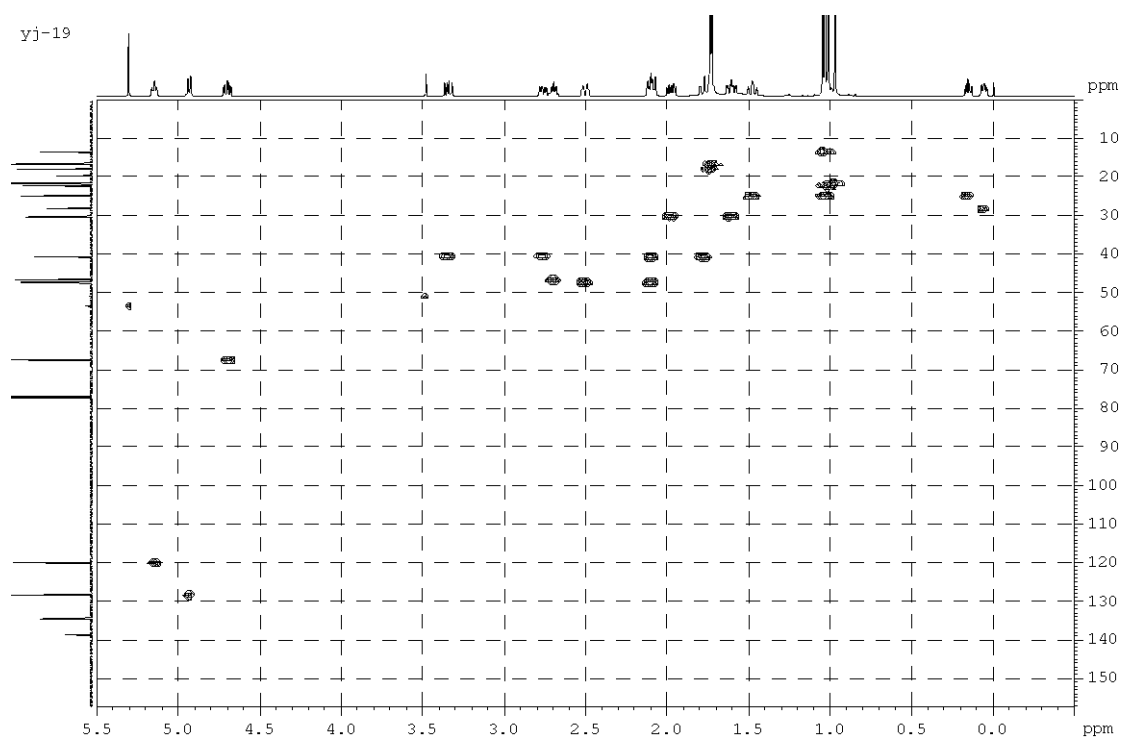**Figure S44.** HMBC spectrum (500 MHz) of compound **6** in CDCl<sub>3</sub>.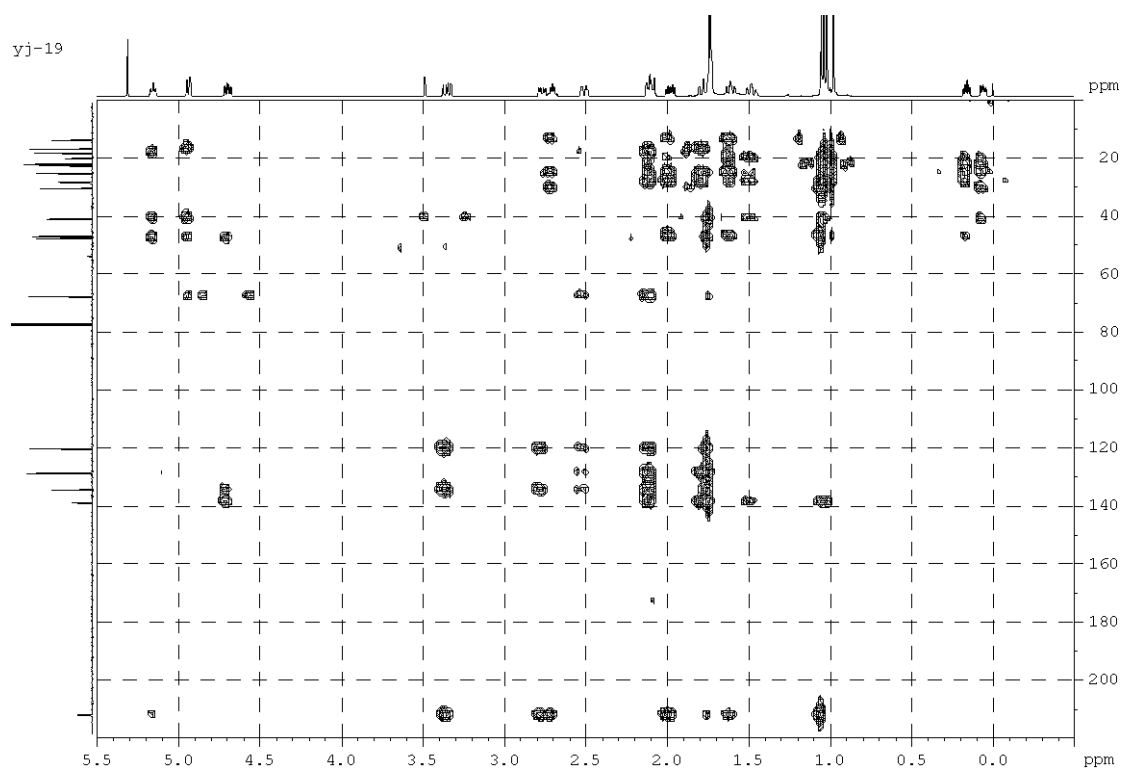



**Figure S45.** COSY spectrum (500 MHz) of compound **6** in CDCl<sub>3</sub>.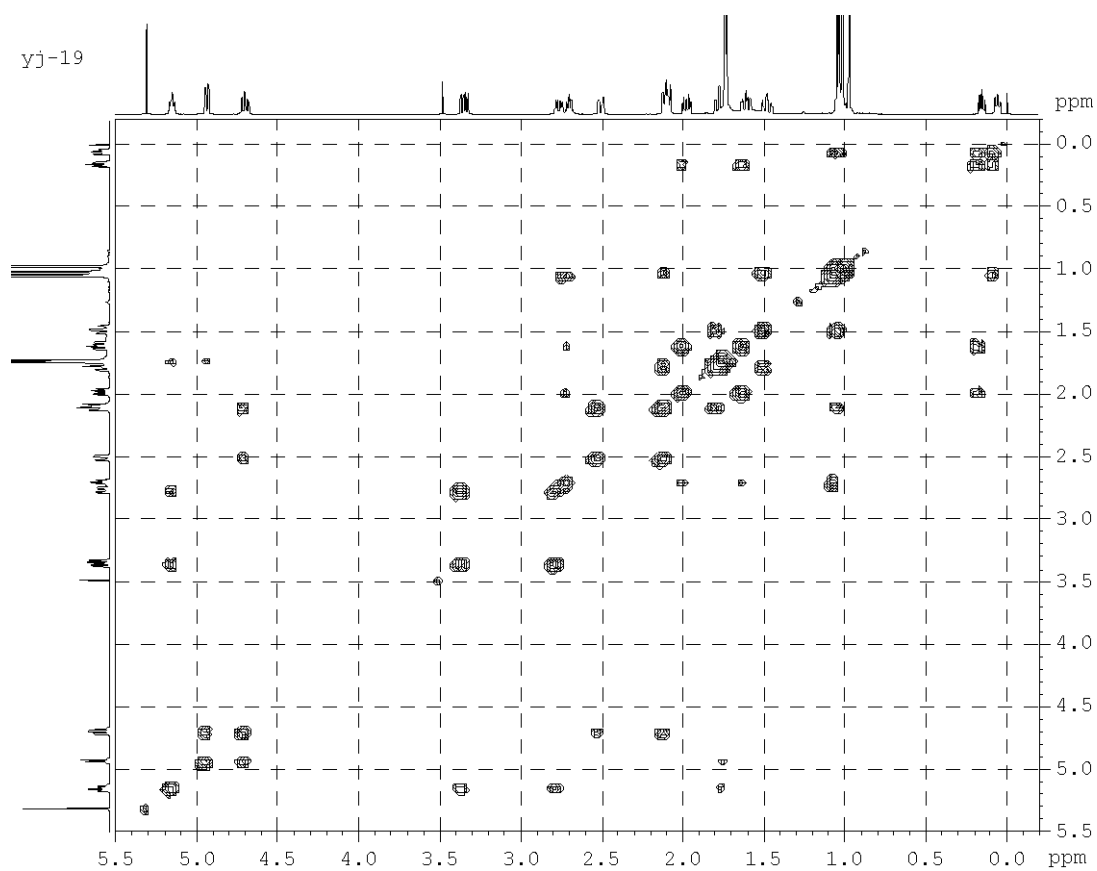**Figure S46.** NOESY spectrum (500 MHz) of compound **6** in CDCl<sub>3</sub>.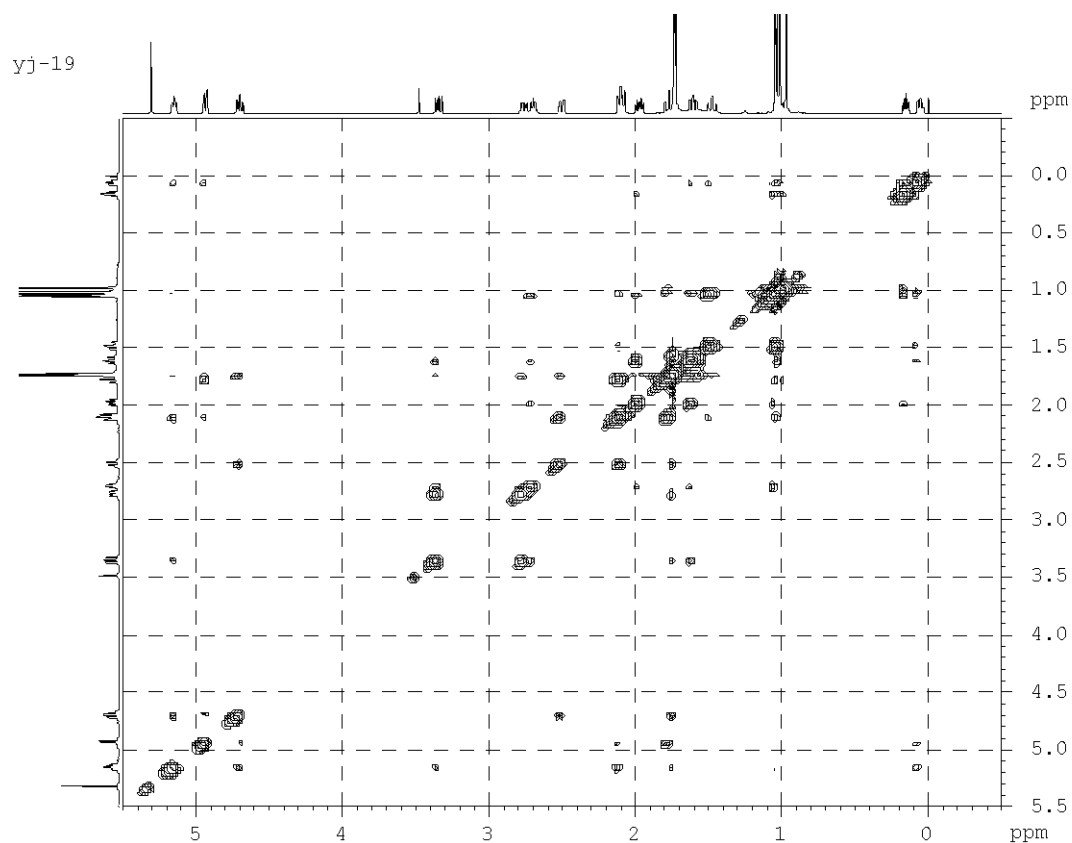

Figure S47. IR spectrum of compound 6.

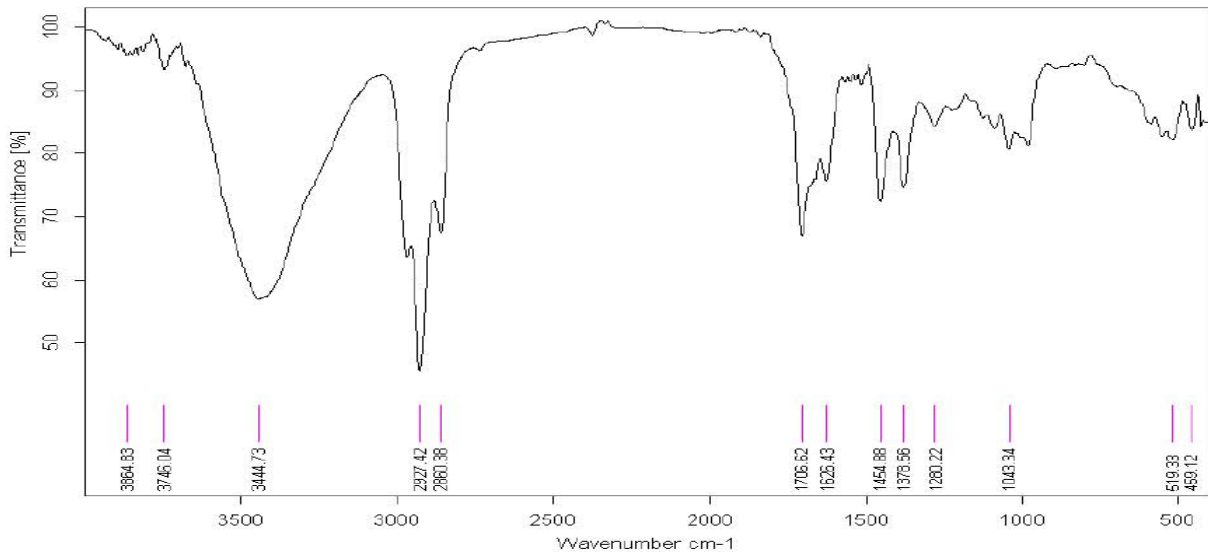

Figure S48. HR-ESIMS spectrum of compound 6.

Generic Display Report

|                      |                      |                  |                     |
|----------------------|----------------------|------------------|---------------------|
| <b>Analysis Info</b> |                      | Acquisition Date | 6/1/2012 2:46:35 PM |
| Analysis Name        | D:\Data\hbl\yj19-2.d | Operator         | BDAL@DE             |
| Method               | tune_150-800.m       | Instrument       | micrOTOF-Q II       |
| Sample Name          | yj19-2               |                  |                     |
| Comment              |                      |                  |                     |

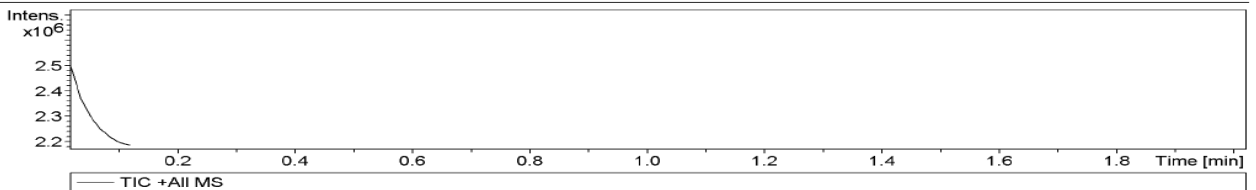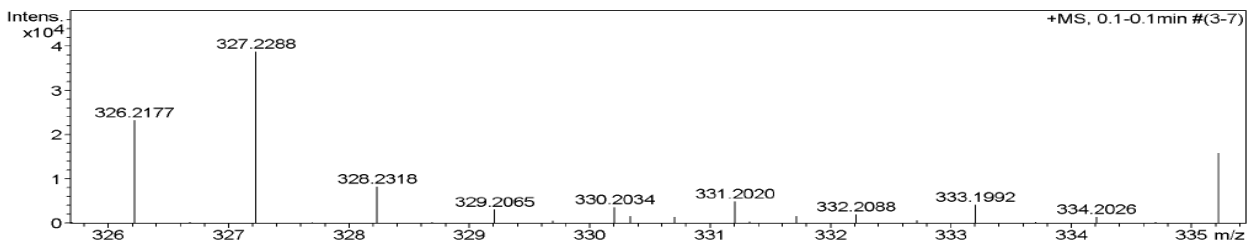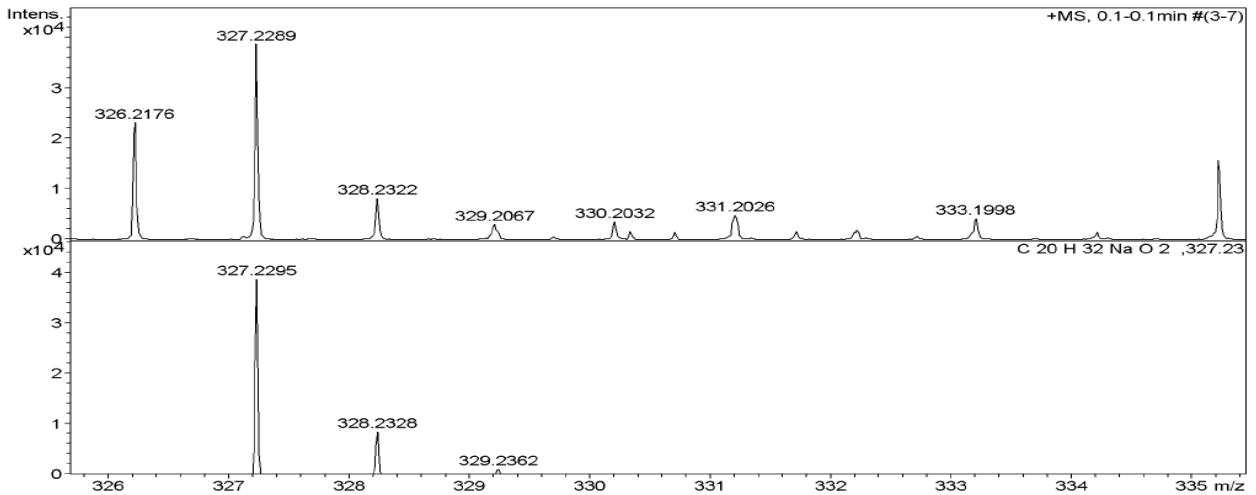

Supplement: marinedrugs-11-00455-s001.pdf [file marinedrugs-11-00455-s001.pdf]
