# Supplementary material for: New Casbane Diterpenoids from a South China Sea Soft Coral, Sinularia sp
Source: MDPI journal article supplement (doi:10.3390/md11020455), 2013-02-06
Supplement: s2 [file s2]

marinedrugs-11-00455-s001.mol
  corina  05201404143D 1   1.00000     0.00000 
CORINA 3.49 0023  12.04.2013
 24 25  0  0  0  0  0  0  0  0999 V2000
    0.0729    1.3270    0.0809 C   0  0  0  0  0  0  0  0  0  0  0  0
    0.3191   -0.1772    0.2166 C   0  0  0  0  0  0  0  0  0  0  0  0
    1.3994    2.0419   -0.0003 C   0  0  0  0  0  0  0  0  0  0  0  0
    1.8267    2.7303    1.0262 C   0  0  0  0  0  0  0  0  0  0  0  0
    3.1787    3.4027    1.0009 C   0  0  0  0  0  0  0  0  0  0  0  0
    3.9058    3.0284    2.2731 C   0  0  0  0  0  0  0  0  0  0  0  0
    3.9540    1.6288    2.6847 C   0  0  0  0  0  0  0  0  0  0  0  0
    4.0834    1.2824    3.9651 C   0  0  0  0  0  0  0  0  0  0  0  0
    3.9118    0.5412    1.6356 C   0  0  0  0  0  0  0  0  0  0  0  0
    2.2158    1.9700   -1.2646 C   0  0  0  0  0  0  0  0  0  0  0  0
    0.2944   -0.5795    1.6682 C   0  0  0  0  0  0  0  0  0  0  0  0
    0.8882   -1.6846    2.0522 C   0  0  0  0  0  0  0  0  0  0  0  0
    1.6033   -2.5402    1.0373 C   0  0  0  0  0  0  0  0  0  0  0  0
    0.8493   -2.1077    3.4971 C   0  0  0  0  0  0  0  0  0  0  0  0
    2.2668   -2.1140    4.0783 C   0  0  0  0  0  0  0  0  0  0  0  0
    3.5842   -0.5625    5.7500 C   0  0  0  0  0  0  0  0  0  0  0  0
    4.0142   -0.1808    4.3333 C   0  0  0  0  0  0  0  0  0  0  0  0
    2.6015   -0.7155    4.5904 C   0  0  0  0  0  0  0  0  0  0  0  0
    3.3335    0.5748    6.7423 C   0  0  0  0  0  0  0  0  0  0  0  0
    4.1763   -1.8405    6.3475 C   0  0  0  0  0  0  0  0  0  0  0  0
    4.7258   -0.8350    3.8355 H   0  0  0  0  0  0  0  0  0  0  0  0
    1.7815    0.0070    4.5364 H   0  0  0  0  0  0  0  0  0  0  0  0
    4.4442    3.8832    2.9450 O   0  0  0  0  0  0  0  0  0  0  0  0
   -0.6991   -0.8891   -0.4894 O   0  0  0  0  0  0  0  0  0  0  0  0
  1  2  1  0      
  1  3  1  0      
  3  4  2  0      
  4  5  1  0      
  5  6  1  0      
  6  7  1  0      
  7  8  2  0      
  7  9  1  0      
  3 10  1  0      
  2 11  1  0      
 11 12  2  0      
 12 13  1  0      
 12 14  1  0      
 14 15  1  0      
  8 17  1  0      
 16 17  1  0      
 17 18  1  0      
 16 18  1  0      
 18 15  1  0      
 16 19  1  0      
 16 20  1  0      
 17 21  1  4      
 18 22  1  4      
  6 23  2  0      
  2 24  1  0      
M  END
$$$$
