# Supplementary material for: New Casbane Diterpenoids from a South China Sea Soft Coral, Sinularia sp
Source: MDPI journal article supplement (doi:10.3390/md11020455), 2013-02-06
Supplement: s4 [file s4]

marinedrugs-11-00455-s002.mol
  corina  05201404143D 1   1.00000     0.00000 
CORINA 3.49 0023  12.04.2013
 24 25  0  0  0  0  0  0  0  0999 V2000
   -0.0184    1.5077    0.0103 C   0  0  0  0  0  0  0  0  0  0  0  0
    0.0021   -0.0041    0.0020 C   0  0  0  0  0  0  0  0  0  0  0  0
   -0.7538   -0.5910    1.1192 C   0  0  0  0  0  0  0  0  0  0  0  0
   -0.3718   -2.0532    1.3839 C   0  0  0  0  0  0  0  0  0  0  0  0
    1.1211   -2.1546    1.7023 C   0  0  0  0  0  0  0  0  0  0  0  0
    1.2602    2.3114    0.0024 C   0  0  0  0  0  0  0  0  0  0  0  0
    1.8849    2.3201    1.3208 C   0  0  0  0  0  0  0  0  0  0  0  0
    3.2018    2.1338    1.3811 C   0  0  0  0  0  0  0  0  0  0  0  0
    3.9924    2.0876    2.6670 C   0  0  0  0  0  0  0  0  0  0  0  0
    4.4215    0.6565    2.8689 C   0  0  0  0  0  0  0  0  0  0  0  0
    3.7349   -0.2575    3.7609 C   0  0  0  0  0  0  0  0  0  0  0  0
    3.3657   -1.4468    3.2475 C   0  0  0  0  0  0  0  0  0  0  0  0
    1.0279    2.4798    2.5162 C   0  0  0  0  0  0  0  0  0  0  0  0
    5.4144    0.2519    2.2524 O   0  0  0  0  0  0  0  0  0  0  0  0
    3.5519    0.1276    5.1904 C   0  0  0  0  0  0  0  0  0  0  0  0
    2.5632   -2.4677    3.8716 C   0  0  0  0  0  0  0  0  0  0  0  0
    1.0521   -2.3799    4.3621 C   0  0  0  0  0  0  0  0  0  0  0  0
    1.3353   -2.9588    2.9679 C   0  0  0  0  0  0  0  0  0  0  0  0
   -2.2443   -0.5711    0.7319 C   0  0  0  0  0  0  0  0  0  0  0  0
   -1.0396    2.0655   -0.0079 O   0  0  0  0  0  0  0  0  0  0  0  0
    0.7171   -3.3639    5.4409 C   0  0  0  0  0  0  0  0  0  0  0  0
    0.4089   -0.9688    4.4198 C   0  0  0  0  0  0  0  0  0  0  0  0
    3.1195   -3.3439    4.3190 H   0  0  0  0  0  0  0  0  0  0  0  0
    1.2684   -4.0883    2.8788 H   0  0  0  0  0  0  0  0  0  0  0  0
  1  2  1  0      
  2  3  1  0      
  3  4  1  0      
  4  5  1  0      
  1  6  1  0      
  6  7  1  0      
  7  8  2  0      
  8  9  1  0      
  9 10  1  0      
 10 11  1  0      
 11 12  2  0      
  7 13  1  0      
 10 14  2  0      
 11 15  1  0      
 12 16  1  0      
 16 17  1  0      
  5 18  1  0      
 18 17  1  0      
 16 18  1  0      
  3 19  1  0      
  1 20  2  0      
 17 21  1  0      
 17 22  1  0      
 16 23  1  4      
 18 24  1  4      
M  END
$$$$
