# Supplementary material for: New Casbane Diterpenoids from a South China Sea Soft Coral, Sinularia sp
Source: MDPI journal article supplement (doi:10.3390/md11020455), 2013-02-06
Supplement: s5 [file s5]

marinedrugs-11-00455-s002.mol
  ChemDraw04241410132D

 24 25  0  0  0  0  0  0  0  0999 V2000
   -1.6867   -0.6452    0.0000 C   0  0  0  0  0  0  0  0  0  0  0  0
   -1.6867   -1.4702    0.0000 C   0  0  0  0  0  0  0  0  0  0  0  0
   -0.9722   -1.8827    0.0000 C   0  0  0  0  0  0  0  0  0  0  0  0
   -0.2577   -1.4702    0.0000 C   0  0  0  0  0  0  0  0  0  0  0  0
   -0.2577   -0.6452    0.0000 C   0  0  0  0  0  0  0  0  0  0  0  0
   -2.0992    0.0693    0.0000 C   0  0  0  0  0  0  0  0  0  0  0  0
   -1.3847    0.4818    0.0000 C   0  0  0  0  0  0  0  0  0  0  0  0
   -1.9681    1.0652    0.0000 C   0  0  0  0  0  0  0  0  0  0  0  0
   -1.5556    1.7797    0.0000 C   0  0  0  0  0  0  0  0  0  0  0  0
   -0.7587    1.9932    0.0000 C   0  0  0  0  0  0  0  0  0  0  0  0
   -0.0442    1.5807    0.0000 C   0  0  0  0  0  0  0  0  0  0  0  0
   -0.0442    0.7557    0.0000 C   0  0  0  0  0  0  0  0  0  0  0  0
   -0.5878    0.6953    0.0000 C   0  0  0  0  0  0  0  0  0  0  0  0
   -0.3462    2.7077    0.0000 O   0  0  0  0  0  0  0  0  0  0  0  0
    0.6702    1.9932    0.0000 C   0  0  0  0  0  0  0  0  0  0  0  0
    0.6702    0.3432    0.0000 C   0  0  0  0  0  0  0  0  0  0  0  0
    1.3847   -0.0693    0.0000 C   0  0  0  0  0  0  0  0  0  0  0  0
    0.6778   -0.3152    0.0000 C   0  0  0  0  0  0  0  0  0  0  0  0
   -0.9722   -2.7077    0.0000 C   0  0  0  0  0  0  0  0  0  0  0  0
   -0.8898   -0.4316    0.0000 O   0  0  0  0  0  0  0  0  0  0  0  0
    2.0992    0.3432    0.0000 C   0  0  0  0  0  0  0  0  0  0  0  0
    2.0992   -0.4818    0.0000 C   0  0  0  0  0  0  0  0  0  0  0  0
    1.3847    0.7557    0.0000 H   0  0  0  0  0  0  0  0  0  0  0  0
    1.2611   -0.8985    0.0000 H   0  0  0  0  0  0  0  0  0  0  0  0
  1  2  1  0      
  2  3  1  0      
  3  4  1  0      
  4  5  1  0      
  1  6  1  0      
  6  7  1  0      
  7  8  2  0      
  8  9  1  0      
  9 10  1  0      
 10 11  1  0      
 11 12  2  0      
  7 13  1  0      
 10 14  2  0      
 11 15  1  0      
 12 16  1  0      
 16 17  1  0      
  5 18  1  0      
 18 17  1  0      
 16 18  1  0      
  3 19  1  6      
  1 20  2  0      
 17 21  1  6      
 17 22  1  1      
 16 23  1  4      
 18 24  1  4      
M  END
