# Supplementary material for: New Casbane Diterpenoids from a South China Sea Soft Coral, Sinularia sp
Source: MDPI journal article supplement (doi:10.3390/md11020455), 2013-02-06
Supplement: s6 [file s6]

marinedrugs-11-00455-s003.mol
  corina  05201404143D 1   1.00000     0.00000 
CORINA 3.49 0023  12.04.2013
 24 25  0  0  0  0  0  0  0  0999 V2000
   -0.0157    1.6085    0.0132 C   0  0  0  0  0  0  0  0  0  0  0  0
    0.0039   -0.0000    0.0026 C   0  0  0  0  0  0  0  0  0  0  0  0
    1.4211    2.1497    0.0034 C   0  0  0  0  0  0  0  0  0  0  0  0
    2.0559    2.2598    1.1401 C   0  0  0  0  0  0  0  0  0  0  0  0
    3.4547    2.7899    1.2425 C   0  0  0  0  0  0  0  0  0  0  0  0
    4.0420    2.4411    2.5451 C   0  0  0  0  0  0  0  0  0  0  0  0
    4.7688    1.0252    2.4625 C   0  0  0  0  0  0  0  0  0  0  0  0
    4.5430    0.1141    3.4821 C   0  0  0  0  0  0  0  0  0  0  0  0
    5.6741    0.7176    1.3528 C   0  0  0  0  0  0  0  0  0  0  0  0
    2.0635    2.5473   -1.2627 C   0  0  0  0  0  0  0  0  0  0  0  0
    0.5175   -0.4279    1.2830 C   0  0  0  0  0  0  0  0  0  0  0  0
    1.7385   -0.9987    1.5263 C   0  0  0  0  0  0  0  0  0  0  0  0
    2.6188   -1.2372    0.4201 C   0  0  0  0  0  0  0  0  0  0  0  0
    2.0630   -1.3153    2.9434 C   0  0  0  0  0  0  0  0  0  0  0  0
    2.8479   -2.6190    2.9570 C   0  0  0  0  0  0  0  0  0  0  0  0
    4.8958   -2.1465    4.5646 C   0  0  0  0  0  0  0  0  0  0  0  0
    5.1803   -1.2282    3.4103 C   0  0  0  0  0  0  0  0  0  0  0  0
    4.3819   -2.4461    3.1244 C   0  0  0  0  0  0  0  0  0  0  0  0
    3.8778   -1.7355    5.6227 C   0  0  0  0  0  0  0  0  0  0  0  0
    6.0459   -3.0207    5.0826 C   0  0  0  0  0  0  0  0  0  0  0  0
    6.2042   -1.2027    3.1325 H   0  0  0  0  0  0  0  0  0  0  0  0
    4.9619   -3.3041    2.5946 H   0  0  0  0  0  0  0  0  0  0  0  0
    4.9889    3.4386    2.9289 O   0  0  0  0  0  0  0  0  0  0  0  0
   -1.3405   -0.4860   -0.1408 O   0  0  0  0  0  0  0  0  0  0  0  0
  1  2  1  0      
  1  3  1  0      
  3  4  2  0      
  4  5  1  0      
  5  6  1  0      
  6  7  1  0      
  7  8  2  0      
  7  9  1  0      
  3 10  1  0      
  2 11  1  0      
 11 12  2  0      
 12 13  1  0      
 12 14  1  0      
 14 15  1  0      
  8 17  1  0      
 16 17  1  0      
 17 18  1  0      
 16 18  1  0      
 18 15  1  0      
 16 19  1  0      
 16 20  1  0      
  2 24  1  0      
  6 23  1  0      
 17 21  1  0      
 18 22  1  0      
M  END
$$$$
