# Supplementary material for: New Casbane Diterpenoids from a South China Sea Soft Coral, Sinularia sp
Source: MDPI journal article supplement (doi:10.3390/md11020455), 2013-02-06
Supplement: s8 [file s8]

marinedrugs-11-00455-s004.mol
  corina  05201404143D 1   1.00000     0.00000 
CORINA 3.49 0023  12.04.2013
 24 25  0  0  0  0  0  0  0  0999 V2000
    0.7049    2.4275   -0.3013 C   0  0  0  0  0  0  0  0  0  0  0  0
    0.5140    0.9096   -0.2869 C   0  0  0  0  0  0  0  0  0  0  0  0
    2.1670    2.7512   -0.1316 C   0  0  0  0  0  0  0  0  0  0  0  0
    2.5466    3.6014    0.7898 C   0  0  0  0  0  0  0  0  0  0  0  0
    4.0087    3.9244    0.9610 C   0  0  0  0  0  0  0  0  0  0  0  0
    4.4262    3.6246    2.3777 C   0  0  0  0  0  0  0  0  0  0  0  0
    5.3588    2.4752    2.6611 C   0  0  0  0  0  0  0  0  0  0  0  0
    4.9653    1.8135    3.9832 C   0  0  0  0  0  0  0  0  0  0  0  0
    3.1918    2.0972   -1.0220 C   0  0  0  0  0  0  0  0  0  0  0  0
    0.5062    0.4169    1.1372 C   0  0  0  0  0  0  0  0  0  0  0  0
    1.3677   -0.4929    1.5198 C   0  0  0  0  0  0  0  0  0  0  0  0
    2.3677   -1.0443    0.5365 C   0  0  0  0  0  0  0  0  0  0  0  0
    1.3578   -0.9890    2.9428 C   0  0  0  0  0  0  0  0  0  0  0  0
    2.7783   -1.3782    3.3570 C   0  0  0  0  0  0  0  0  0  0  0  0
    4.6587   -0.5810    4.9904 C   0  0  0  0  0  0  0  0  0  0  0  0
    4.7282    0.3192    3.7552 C   0  0  0  0  0  0  0  0  0  0  0  0
    3.3859   -0.2593    4.2056 C   0  0  0  0  0  0  0  0  0  0  0  0
    4.8316    0.0820    6.3584 C   0  0  0  0  0  0  0  0  0  0  0  0
    5.2271   -1.9960    4.8663 C   0  0  0  0  0  0  0  0  0  0  0  0
    5.1784   -0.0964    2.8538 H   0  0  0  0  0  0  0  0  0  0  0  0
    2.6713    0.4250    4.6629 H   0  0  0  0  0  0  0  0  0  0  0  0
    4.0140    4.3057    3.2857 O   0  0  0  0  0  0  0  0  0  0  0  0
   -0.7282    0.5800   -0.9117 O   0  0  0  0  0  0  0  0  0  0  0  0
    5.2632    1.4500    1.5293 C   0  0  0  0  0  0  0  0  0  0  0  0
  1  2  1  0      
  1  3  1  0      
  3  4  2  0      
  4  5  1  0      
  5  6  1  0      
  6  7  1  0      
  7  8  1  0      
  3  9  1  0      
  2 10  1  0      
 10 11  2  0      
 11 12  1  0      
 11 13  1  0      
 13 14  1  0      
  8 16  1  0      
 15 16  1  0      
 16 17  1  0      
 15 17  1  0      
 17 14  1  0      
 15 18  1  0      
 15 19  1  0      
  2 23  1  0      
  6 22  2  0      
  7 24  1  0      
 16 20  1  4      
 17 21  1  4      
M  END
$$$$
