# Supplementary material for: New Casbane Diterpenoids from a South China Sea Soft Coral, Sinularia sp
Source: MDPI journal article supplement (doi:10.3390/md11020455), 2013-02-06
Supplement: s9 [file s9]

marinedrugs-11-00455-s004.mol
  ChemDraw04241410142D

 24 25  0  0  0  0  0  0  0  0999 V2000
   -1.7015    0.0759    0.0000 C   0  0  0  0  0  0  0  0  0  0  0  0
   -1.7015   -0.7491    0.0000 C   0  0  0  0  0  0  0  0  0  0  0  0
   -0.9871    0.4884    0.0000 C   0  0  0  0  0  0  0  0  0  0  0  0
   -1.4746    1.1278    0.0000 C   0  0  0  0  0  0  0  0  0  0  0  0
   -0.9796    1.7466    0.0000 C   0  0  0  0  0  0  0  0  0  0  0  0
   -0.1340    1.9941    0.0000 C   0  0  0  0  0  0  0  0  0  0  0  0
    0.5054    1.5197    0.0000 C   0  0  0  0  0  0  0  0  0  0  0  0
    0.5054    0.5916    0.0000 C   0  0  0  0  0  0  0  0  0  0  0  0
   -0.1902    0.7020    0.0000 C   0  0  0  0  0  0  0  0  0  0  0  0
   -0.9871   -1.1616    0.0000 C   0  0  0  0  0  0  0  0  0  0  0  0
   -0.4434   -1.9659    0.0000 C   0  0  0  0  0  0  0  0  0  0  0  0
   -0.4434   -2.7909    0.0000 C   0  0  0  0  0  0  0  0  0  0  0  0
    0.3404   -1.4297    0.0000 C   0  0  0  0  0  0  0  0  0  0  0  0
    0.3404   -0.5841    0.0000 C   0  0  0  0  0  0  0  0  0  0  0  0
    1.6191   -0.0891    0.0000 C   0  0  0  0  0  0  0  0  0  0  0  0
    1.1035    0.2409    0.0000 C   0  0  0  0  0  0  0  0  0  0  0  0
    1.1035   -0.2953    0.0000 C   0  0  0  0  0  0  0  0  0  0  0  0
    2.3336   -0.5016    0.0000 C   0  0  0  0  0  0  0  0  0  0  0  0
    2.4160    0.1245    0.0000 C   0  0  0  0  0  0  0  0  0  0  0  0
    1.6868    0.8243    0.0000 H   0  0  0  0  0  0  0  0  0  0  0  0
    1.5160   -1.0098    0.0000 H   0  0  0  0  0  0  0  0  0  0  0  0
    0.0795    2.7909    0.0000 O   0  0  0  0  0  0  0  0  0  0  0  0
   -2.4160   -1.1616    0.0000 O   0  0  0  0  0  0  0  0  0  0  0  0
    1.2198    1.9322    0.0000 C   0  0  0  0  0  0  0  0  0  0  0  0
  1  2  1  0      
  1  3  1  0      
  3  4  2  0      
  4  5  1  0      
  5  6  1  0      
  6  7  1  0      
  7  8  1  0      
  3  9  1  0      
  2 10  1  0      
 10 11  2  0      
 11 12  1  0      
 11 13  1  0      
 13 14  1  0      
  8 16  1  0      
 15 16  1  0      
 16 17  1  0      
 15 17  1  0      
 17 14  1  0      
 15 18  1  1      
 15 19  1  6      
  2 23  1  1      
  6 22  2  0      
  7 24  1  6      
 16 20  1  4      
 17 21  1  4      
M  END
