# Supplementary material for: New Casbane Diterpenoids from a South China Sea Soft Coral, Sinularia sp
Source: MDPI journal article supplement (doi:10.3390/md11020455), 2013-02-06
Supplement: s10 [file s10]

marinedrugs-11-00455-s005.mol
  corina  05201404143D 1   1.00000     0.00000 
CORINA 3.49 0023  12.04.2013
 24 25  0  0  0  0  0  0  0  0999 V2000
    0.5956    1.3458    0.0709 C   0  0  0  0  0  0  0  0  0  0  0  0
    0.6578   -0.1590    0.1772 C   0  0  0  0  0  0  0  0  0  0  0  0
    2.0012    1.8906    0.1529 C   0  0  0  0  0  0  0  0  0  0  0  0
    2.4832    2.2464    1.3131 C   0  0  0  0  0  0  0  0  0  0  0  0
    3.9074    2.7251    1.4598 C   0  0  0  0  0  0  0  0  0  0  0  0
    4.5139    2.0063    2.6436 C   0  0  0  0  0  0  0  0  0  0  0  0
    4.3569    0.5596    2.7575 C   0  0  0  0  0  0  0  0  0  0  0  0
    4.4039   -0.0611    3.9365 C   0  0  0  0  0  0  0  0  0  0  0  0
    2.8286    2.0259   -1.0992 C   0  0  0  0  0  0  0  0  0  0  0  0
    0.6202   -0.8130    1.4851 C   0  0  0  0  0  0  0  0  0  0  0  0
    0.7876   -2.1386    1.5663 C   0  0  0  0  0  0  0  0  0  0  0  0
    1.0304   -2.9348    0.3074 C   0  0  0  0  0  0  0  0  0  0  0  0
    0.7237   -2.8373    2.8973 C   0  0  0  0  0  0  0  0  0  0  0  0
    2.1338   -3.1366    3.4047 C   0  0  0  0  0  0  0  0  0  0  0  0
    3.6548   -2.1482    5.3192 C   0  0  0  0  0  0  0  0  0  0  0  0
    4.1304   -1.5430    3.9971 C   0  0  0  0  0  0  0  0  0  0  0  0
    2.6561   -1.9288    4.1804 C   0  0  0  0  0  0  0  0  0  0  0  0
    3.5618   -1.2166    6.5293 C   0  0  0  0  0  0  0  0  0  0  0  0
    4.0694   -3.5886    5.6261 C   0  0  0  0  0  0  0  0  0  0  0  0
    4.7450   -2.1726    3.3549 H   0  0  0  0  0  0  0  0  0  0  0  0
    1.9425   -1.1085    4.2958 H   0  0  0  0  0  0  0  0  0  0  0  0
    5.1241    2.6255    3.4900 O   0  0  0  0  0  0  0  0  0  0  0  0
    0.7393   -0.8308   -0.8298 O   0  0  0  0  0  0  0  0  0  0  0  0
    4.1883   -0.2726    1.5027 C   0  0  0  0  0  0  0  0  0  0  0  0
  1  2  1  0      
  1  3  1  0      
  3  4  2  0      
  4  5  1  0      
  5  6  1  0      
  6  7  1  0      
  7  8  2  0      
  3  9  1  0      
  2 10  1  0      
 10 11  2  0      
 11 12  1  0      
 11 13  1  0      
 13 14  1  0      
  8 16  1  0      
 15 16  1  0      
 16 17  1  0      
 15 17  1  0      
 17 14  1  0      
 15 18  1  0      
 15 19  1  0      
  6 22  2  0      
  7 24  1  0      
 16 20  1  0      
 17 21  1  0      
  2 23  2  0      
M  END
$$$$
